# Supplementary material for: Silver Diamine Fluoride (SDF) Efficacy in Arresting Cavitated Caries Lesions in Primary Molars: A Systematic Review and Metanalysis
Source: MDPI journal article supplement (doi:10.3390/ijerph191912917), 2022-10-09
Supplement: s1 [file s1]

|                                                                                 |    |
|---------------------------------------------------------------------------------|----|
| Table S1. Extraction form .....                                                 | 1  |
| Table S2. Studies excluded after title and abstract screening .....             | 4  |
| Table S3. Studies studies excluded after full-text reading .....                | 48 |
| Table S4. Summary statistics, results for each study (fixed-effect model) ..... | 50 |

**Table S1.** Extraction form.

|                       |                                                      |  |  |  |  |  |
|-----------------------|------------------------------------------------------|--|--|--|--|--|
|                       | Publication Year                                     |  |  |  |  |  |
|                       | Author                                               |  |  |  |  |  |
|                       | Title                                                |  |  |  |  |  |
|                       | Item Type (Article, Thesis, Congress presentation..) |  |  |  |  |  |
|                       | Journal                                              |  |  |  |  |  |
|                       | Type of study (RCT, retrospectivo,...)               |  |  |  |  |  |
| N° of patient treated | Total number of patient                              |  |  |  |  |  |
|                       | Treated                                              |  |  |  |  |  |

|                                                                       |                                          |  |  |  |  |  |
|-----------------------------------------------------------------------|------------------------------------------|--|--|--|--|--|
|                                                                       | Control                                  |  |  |  |  |  |
| N° of POSTERIOR tooth treated                                         | Total number of POSTERIOR tooth          |  |  |  |  |  |
|                                                                       | Treated                                  |  |  |  |  |  |
|                                                                       | Control                                  |  |  |  |  |  |
| Baseline characteristics (if data available, divided based on groups) | Patient's age range                      |  |  |  |  |  |
|                                                                       | n° female and male                       |  |  |  |  |  |
|                                                                       | ICDAS/dmft                               |  |  |  |  |  |
| Study Protocol                                                        | Primary outcome                          |  |  |  |  |  |
|                                                                       | Secondary outcome                        |  |  |  |  |  |
|                                                                       | TEST GROUP<br>(SDF+Evtl other treatment) |  |  |  |  |  |
|                                                                       | TEST GROUP Follow up<br>(mo./yy)         |  |  |  |  |  |

|         |                                                           |  |  |  |  |  |
|---------|-----------------------------------------------------------|--|--|--|--|--|
|         | CONTROL GROUP<br>(no treatment/ ART/<br>fluoride varnish) |  |  |  |  |  |
|         | CONTROL GROUP Follow<br>up (mo./yy)                       |  |  |  |  |  |
|         | Setting (dental clinic,<br>school..)                      |  |  |  |  |  |
|         | Operator (dentist, hygienist,<br>....)                    |  |  |  |  |  |
|         | Blinding                                                  |  |  |  |  |  |
|         | Esame                                                     |  |  |  |  |  |
| Results | TEST GROUP                                                |  |  |  |  |  |
|         | TEST GROUP p-value                                        |  |  |  |  |  |
|         | CONTROL GROUP                                             |  |  |  |  |  |
|         | CONTROL GROUP p-<br>value                                 |  |  |  |  |  |
|         | Country                                                   |  |  |  |  |  |

|  |          |  |  |  |  |  |
|--|----------|--|--|--|--|--|
|  | Database |  |  |  |  |  |
|--|----------|--|--|--|--|--|

**Table S2.** Studies excluded after title and abstract screening.

| Publication Year | Author Names                                                                                                                                                                                                                                                                                       | Title                                                                                                                                   | Source title                                        | Reason for exclusion    |
|------------------|----------------------------------------------------------------------------------------------------------------------------------------------------------------------------------------------------------------------------------------------------------------------------------------------------|-----------------------------------------------------------------------------------------------------------------------------------------|-----------------------------------------------------|-------------------------|
| 2016             | Duangthip D, Jiang M, Chu CH, Lo EC.                                                                                                                                                                                                                                                               | Restorative approaches to treat dentin caries in preschool children: systematic review                                                  | European Journal of Paediatric dentistry            | Different type of study |
| 2020             | Splieth CH, Banerjee A, Bottenberg P, Breschi L, Campus G, Ekstrand KR, Giacaman RA, Haak R, Hannig M, Hickel R, Juric H, Lussi A, Machiulskiene V, Manton DJ, Jablonski-Momeni A, Opdam NJM, Paris S, Santamaría RM, Schwendicke F, Tassery H, Ferreira Zandona A, Zero DT, Zimmer S, Doméjean S. | How to Intervene in the Caries Process in Children: A Joint ORCA and EFCD Expert Delphi Consensus Statement                             | Caries research                                     | Different type of study |
| 2020             | Santamaría RM, Abudrya MH, Gül G, Mourad MS, Gomez GF, Zandona AGF.                                                                                                                                                                                                                                | How to Intervene in the Caries Process: Dentin Caries in Primary Teeth                                                                  | Caries research                                     | Different type of study |
| 2021             | Al Masri A, Abudrya MEH, Splieth CH, Schmoekel J, Mourad MS, Santamaría RM.                                                                                                                                                                                                                        | How did the COVID-19 pandemic lockdown affect dental emergency care in children? Retrospective study in a specialized pedodontic center | Quintessence Int                                    | Different outcome       |
| 2017             | [No author name available]                                                                                                                                                                                                                                                                         | JUCSF protocol for caries arrest using silver diamine fluoride: rationale, indications, and consent                                     | British dental journal                              | Different type of study |
| 2020             | Aarthi S., Arangannal P., Jeevarathan J., Vijayakumar M., Aarthi J., Amudha S.                                                                                                                                                                                                                     | The decision maker - An insight on factors influencing parental acceptance of utilising sdf treatment for their children                | European Journal of Molecular and Clinical Medicine | Different outcome       |

|      |                                                                                          |                                                                                                                                                                                                              |                                                                   |                          |
|------|------------------------------------------------------------------------------------------|--------------------------------------------------------------------------------------------------------------------------------------------------------------------------------------------------------------|-------------------------------------------------------------------|--------------------------|
| 2021 | Abdelaziz M, Yang V, Chang N, Darling C, Fried W, Seto J, Fried D.                       | Monitoring silver diamine fluoride application with optical coherence tomography                                                                                                                             | Proc SPIE Int Soc Opt Eng                                         | Different type of study  |
| 2020 | Abdullah N, Al Marzooq F, Mohamad S, Abd Rahman N, Rani KGA, Chi Ngo H, Samaranayake LP. | The antibacterial efficacy of silver diamine fluoride (SDF) is not modulated by potassium iodide (KI) supplements: A study on in-situ plaque biofilms using viability real-time PCR with propidium monoazide | PLoS One                                                          | Different type of sample |
| 2011 | Aboushelib M.N.                                                                          | Clinical performance of self-etching adhesives with saliva contamination.                                                                                                                                    | The journal of adhesive dentistry                                 | Serch noise              |
| 1996 | Afonso F, Gotjamanos T.                                                                  | An in vitro study of the distribution of silver and fluoride following application of 40 per cent silver fluoride solution to dentine                                                                        | Aust Dent J                                                       | Different type of study  |
| 2021 | Ahmed AM, Abdellatif HM, Baghdady SI, Abdelaziz WE, Elkateb MA.                          | Child Discomfort and Parental Acceptability of Silver Diamine Fluoride and Alternative Restorative Treatment: A Randomized Controlled Clinical Trial                                                         | J Dent                                                            | Different outcome        |
| 2019 | Ahmed, F., Prashanth, S., Sindhu, K., Nayak, A., Chaturvedi, S.                          | Antimicrobial efficacy of nanosilver and chitosan against Streptococcus mutans, as an ingredient of toothpaste formulation: An in vitro study                                                                | Journal of Indian Society of Pedodontics and Preventive Dentistry | Serch noise              |
| 2020 | Ahsana A., Gurunathan D.                                                                 | Effect of silver diamine fluoride treatment on the quality of life of children                                                                                                                               | Indian Journal of Forensic Medicine and Toxicology                | Different outcome        |
| 2019 | Akyildiz M, SÄ¶nmez IS.                                                                  | Comparison of Remineralising Potential of Nano Silver Fluoride, Silver Diamine Fluoride and Sodium Fluoride Varnish on Artificial Caries: An In Vitro Study                                                  | Oral Health Prev Dent                                             | Different type of study  |
| 2021 | Al Habdan, A.H., Al Awdah, A., Aldosari, G., Almogbel, S., Alawaji, R.                   | Caries arrest using silver diamine fluoride: Knowledge, attitude, and perception of adult patients in Saudi Arabia                                                                                           | Saudi Dental Journal                                              | Different outcome        |
| 2020 | Alajlan, G., Alshaikh, H., Alshamrani, L., Alanezi, M., Alarfaj, S., Alswayyed, T.       | Knowledge on and attitude toward silver diamine fluoride among Saudi dental practitioners in Riyadh public hospitals                                                                                         | Clinical, Cosmetic and Investigational Dentistry                  | Different outcome        |
| 2019 | Al-Angari SS, Lippert F, Platt JA, Eckert GJ, GonzÄ¡lez-Cabezas C, Li Y, Hara AT.        | Bleaching of simulated stained-remineralized caries lesions in vitro                                                                                                                                         | Clin Oral Investig                                                | Different type of study  |

|      |                                                                                                    |                                                                                                                                                                  |                                                            |                          |
|------|----------------------------------------------------------------------------------------------------|------------------------------------------------------------------------------------------------------------------------------------------------------------------|------------------------------------------------------------|--------------------------|
| 2021 | Aldhaian, B.A., Balhaddad, A.A., Alfaifi, A.A., Levon, J.A., Eckert, G.J., Hara, A.T., Lippert, F. | In vitro demineralization prevention by fluoride and silver nanoparticles when applied to sound enamel and enamel caries-like lesions of varying severities      | Journal of Dentistry                                       | Different type of study  |
| 2021 | Aldhuwayhi, S.                                                                                     | Silver diamine fluoride in reducing dentin hypersensitivity in vital tooth preparation: A case report                                                            | International Journal of Dentistry and Oral Science        | Different outcome        |
| 2021 | Ali, A., Ismail, H., Amin, K.                                                                      | Effect of nanosilver mouthwash on prevention of white spot lesions in patients undergoing fixed orthodontic treatment - a randomized double-blind clinical trial | Journal of Dental Sciences                                 | Serch noise              |
| 2019 | Allen PF, Da Mata C, Hayes M.                                                                      | Minimal intervention dentistry for partially dentate older adults                                                                                                | Gerodontology                                              | Different type of sample |
| 2021 | Almarwan M, Almawash A, AlBrekan A, Albluwi S.                                                     | Parental Acceptance for the Use of Silver Diamine Fluoride on Their Special Health Care-Needs Child's Primary and Permanent Teeth                                | Clin Cosmet Investig Dent                                  | Different outcome        |
| 2020 | Al-Nerabieah, Z., Arrag, E.A., Rajab, A.                                                           | Cariostatic efficacy and children acceptance of nano-silver fluoride versus silver diamine fluoride: A randomized controlled clinical trial                      | Open Journal of Stomatology                                | Follow up < 12 mo.       |
| 2020 | Alshahni R.Z., Alshahni M.M., Hiraishi N., Makimura K., Tagami J.                                  | Effect of Silver Diamine Fluoride on Reducing Candida albicans Adhesion on Dentine                                                                               | Mycopathologia                                             | Different outcome        |
| 2019 | Alshammari AF, Almuqrin AA, Aldakhil AM, Alshammari BH, Lopez JNJ.                                 | Parental perceptions and acceptance of silver diamine fluoride treatment in Kingdom of Saudi Arabia                                                              | Int J Health Sci (Qassim)                                  | Different outcome        |
| 2013 | Alves, F.B.T., Lenzi, T.L., Reis, A., Loguercio, A.D., Carvalho, T.S., Raggio, D.P.                | Bonding of simplified adhesive systems to caries-affected dentin of primary teeth                                                                                | Journal of Adhesive Dentistry                              | Serch noise              |
| 2010 | Alves, T.M.S., Silva, C.A., da Silva, N.B., de Medeiros, E.B., ValenÃa, A.M.G.                    | Antimicrobial activity of fluoridated products on biofilm-forming bacteria: An in vitro study                                                                    | Pesquisa Brasileira em Odontopediatria e Clinica Integrada | Different outcome        |
| 2019 | Antonioni MB, Fontana M, Salzmann LB, Inglehart MR.                                                | Pediatric Dentists' Silver Diamine Fluoride Education, Knowledge, Attitudes, and Professional Behavior: A National Survey                                        | J Dent Educ                                                | Different type of study  |

|      |                                                                                                                                           |                                                                                                                               |                                                              |                                     |
|------|-------------------------------------------------------------------------------------------------------------------------------------------|-------------------------------------------------------------------------------------------------------------------------------|--------------------------------------------------------------|-------------------------------------|
| 2006 | Ariffin, Z., Ngo, H., McIntyre, J.                                                                                                        | Enhancement of fluoride release from glass ionomer cement following a coating of silver fluoride                              | Australian Dental Journal                                    | Different type of study             |
| 2021 | Arnaud M, Junior PC, Lima MG, E Silva AV, Araujo JT, Gallemebeck A, de Fran  sa Caldas J  nior A, Rosenblatt A.                           | Nano-silver Fluoride at Higher Concentration for Caries Arrest in Primary Molars: A Randomized Controlled Trial               | Int J Clin Pediatr Dent                                      | Serch noise                         |
| 1995 | Aron V.O.                                                                                                                                 | Porcelain veneers for primary incisors: a case report.                                                                        | Quintessence international (Berlin, Germany : 1985)          | Serch noise                         |
| 2012 | Ashkenazi, M., Bidoosi, M., Levin, L.                                                                                                     | Factors associated with reduced compliance of children to dental preventive measures                                          | Odontology                                                   | Serch noise                         |
| 2020 | Asif A., Gurunathan D.                                                                                                                    | Parental acceptance of silver diamine fluoride treatment for children                                                         | International Journal of Research in Pharmaceutical Sciences | Different outcome                   |
| 2008 | Awliya, W.Y., El-Sahn, A.M.                                                                                                               | Leakage pathway of Class V cavities restored with different flowable resin composite restorations                             | Operative Dentistry                                          | Serch noise                         |
| 2019 | Bagher S.M., Sabbagh H.J., Aljohani S.M., Alharbi G., Aldajani M., Elkhodary H.                                                           | Parental acceptance of the utilization of silver diamine fluoride on their child's primary and permanent teeth                | Patient Preference and Adherence                             | Different type of study             |
| 2021 | Bahathiq, A., Arafa, A.                                                                                                                   | Factors modulating parental acceptance of SDF treatment                                                                       | Pediatric Dental Journal                                     | Different outcome                   |
| 2019 | Bakhsh, T.A., Altouki, N.H., Baesa, L.S., Baamer, R.A., Alshebany, R.M., Natto, Z., Nasir, A., Turkistani, A., Hasanain, F., Naguib, G.H. | Effect of self-etch adhesives on the internal adaptation of composite restoration: a CP-OCT Study                             | Odontology                                                   | Serch noise                         |
| 2015 | Barrak, I., Urb  jn, E., Turz   , K., Nagy, K., Braunitzer, G., St  ijer, A.                                                              | Short- and long-term influence of fluoride-containing prophylactics on the growth of streptococcus mutans on titanium surface | Implant Dentistry                                            | Serch noise                         |
| 1984 | Barreiro Davina A, Alvarez Brasa C.                                                                                                       | Dentin remineralization                                                                                                       | Rev Actual Estomatol Esp                                     | Abstract or full-text not available |

|      |                                                                                                     |                                                                                                                                          |                                                            |                         |
|------|-----------------------------------------------------------------------------------------------------|------------------------------------------------------------------------------------------------------------------------------------------|------------------------------------------------------------|-------------------------|
| 2017 | Barreto, K.A., dos Prazeres, L.D.K.T., Lima, D.S.M., Redivivo, R.M.M.P., Colares, V.                | Children's anxiety during dental treatment with minimally invasive approaches: Findings of an analytical cross-sectional study           | Pesquisa Brasileira em Odontopediatria e Clínica Integrada | Different outcome       |
| 2010 | Beltrajn-Aguilar ED.                                                                                | Silver diamine fluoride (SDF) may be better than fluoride varnish and no treatment in arresting and preventing cavitated carious lesions | J Evid Based Dent Pract                                    | Different type of study |
| 1988 | Berg, J.H., Donly, K.J., Posnick, W.R.                                                              | Glass ionomer-silver restorations: a demineralization-remineralization concept.                                                          | Quintessence international                                 | Serch noise             |
| 1990 | Berg, J.H., Farrell, J.E., Brown, L.R.                                                              | Class II glass ionomer/silver cermet restorations and their effect on interproximal growth of mutans streptococci.                       | Pediatric dentistry                                        | Serch noise             |
| 2020 | Bernabe E, Marcenes W.                                                                              | Can minimal intervention dentistry help in tackling the global burden of untreated dental caries?                                        | Br Dent J                                                  | Different type of study |
| 1986 | Billings, R.J.                                                                                      | Restoration of Carious Lesions of the Root                                                                                               | Gerodontology                                              | Serch noise             |
| 2018 | Bimstein E., Damm D.                                                                                | Human Primary Tooth Histology Six Months after Treatment with Silver Diamine Fluoride                                                    | The Journal of clinical pediatric dentistry                | Different outcome       |
| 2009 | Bonifacio, C.C., Navarro, R.S., Sardenberg, F., Imparato, J.C.P., de Carvalho, R.C.R., Raggio, D.P. | Microleakage of an adhesive system used as a fissure sealant                                                                             | Journal of Contemporary Dental Practice                    | Serch noise             |
| 2016 | Bowen DM.                                                                                           | Effectiveness of Professionally-Applied Silver Diamine Fluoride in Arresting Dental Caries                                               | J Dent Hyg                                                 | Different type of study |
| 2009 | Braga MM, Mendes FM, De Benedetto MS, Imparato JC.                                                  | Effect of silver diammine fluoride on incipient caries lesions in erupting permanent first molars: a pilot study                         | J Dent Child (Chic)                                        | Different outcome       |
| 2020 | Braz, P.V.F., Dos Santos, A.F.L., Leal, S.C., Pereira, P.N.R., Ribeiro, A.P.D.                      | The effect of silver diamine fluoride and cleaning methods on bond strength of glass-ionomer cements to caries-affected dentin           | American Journal of Dentistry                              | Different type of study |



|      |                                                                                            |                                                                                                                                                                                              |                                                   |                         |
|------|--------------------------------------------------------------------------------------------|----------------------------------------------------------------------------------------------------------------------------------------------------------------------------------------------|---------------------------------------------------|-------------------------|
| 2020 | Braz, P.V.F., Dos Santos, A.F.L., Pereira, P.N.R., Ribeiro, A.P.D.                         | Silver diamine fluoride and cleaning methods effects on dentin bond strength                                                                                                                 | American Journal of Dentistry                     | Different outcome       |
| 2021 | Bridge, G., Martel, A.-S., Lomazzi, M.                                                     | Silver Diamine Fluoride: Transforming Community Dental Caries Program: THE USE OF SDF IN COMMUNITY CARIES PROGRAMMES                                                                         | International Dental Journal                      | Different type of study |
| 2019 | Brignardello-Petersen R.                                                                   | Silver diamine fluoride seems to be effective in preventing and arresting root caries in older adults compared with placebo, but there is very low certainty in the magnitude of the benefit | J Am Dent Assoc                                   | Different outcome       |
| 2017 | Brignardello-Petersen R.                                                                   | 37% silver diamine fluoride is more effective than 12% silver diamine fluoride in arresting caries in the primary dentition                                                                  | J Am Dent Assoc                                   | Different type of study |
| 2018 | Brignardello-Petersen R.                                                                   | Although silver diamine fluoride arrested caries sooner than fluoride varnish, the overall proportion of arrested caries was not importantly different after 30 months                       | J Am Dent Assoc                                   | Different type of study |
| 2018 | Brignardello-Petersen R.                                                                   | Increasing concentration and application frequency of silver diamine fluoride results in more arrested carious lesions being stained black but no other important adverse effects            | J Am Dent Assoc                                   | Different type of study |
| 2021 | Brondani MA, Siarkowski M, Alibrahim I, Ribeiro CCC, Alves CMC, Donnelly LR, Mathu-Muju K. | An Overview of Pedagogical Approaches to Caries-Control Medications in Canadian Dental and Dental Hygiene Programs                                                                           | J Can Dent Assoc                                  | Serch noise             |
| 2018 | Burgess JO, Vaghela PM.                                                                    | Silver Diamine Fluoride: A Successful Anticariou Solution with Limits                                                                                                                        | Adv Dent Res                                      | Different type of study |
| 2019 | Burgette J.M., Weintraub J.A., Birken S.A., Lewis T.A., White B.A.                         | Development of a Silver Diamine Fluoride Protocol in Safety Net Dental Settings                                                                                                              | Journal of dentistry for children (Chicago, Ill.) | Different outcome       |
| 2015 | Burns J, Hollands K.                                                                       | Nano Silver Fluoride for preventing caries                                                                                                                                                   | Evid Based Dent                                   | Serch noise             |
| 2020 | C C BO, A R VO, R Y SB, M A AT.                                                            | Study of Demineralized Dental Enamel Treated with Different Fluorinated Compounds by Raman Spectroscopy                                                                                      | J Biomed Phys Eng                                 | Different type of study |

|      |                                                                                                                           |                                                                                                                                                                                                                                                     |                                    |                                     |
|------|---------------------------------------------------------------------------------------------------------------------------|-----------------------------------------------------------------------------------------------------------------------------------------------------------------------------------------------------------------------------------------------------|------------------------------------|-------------------------------------|
| 2019 | Cai J, Burrow MF, Manton DJ, Tsuda Y, Sobh EG, Palamara JEA.                                                              | Effects of silver diamine fluoride/potassium iodide on artificial root caries lesions with adjunctive application of proanthocyanidin                                                                                                               | Acta Biomater                      | Serch noise                         |
| 2015 | Calarco, A., Di Salle, A., Tammaro, L., De Luca, I., Mucerino, S., Petillo, O., Riccitiello, F., Vittoria, V., Peluso, G. | Long-term fluoride release from dental resins affects STRO-1+ cell behavior                                                                                                                                                                         | Journal of Dental Research         | Serch noise                         |
| 2018 | Canares G, Hsu KL, Dhar V, Katechia B.                                                                                    | Evidence-based care pathways for management of early childhood caries                                                                                                                                                                               | Gen Dent                           | Different type of study             |
| 1971 | Canton A.                                                                                                                 | Topical application of a silver nitrate ammonia solution of high concentration                                                                                                                                                                      | Mondo odontostomatologico          | Abstract or full-text not available |
| 2015 | Carrera, C.A., Lan, C., Escobar-Sanabria, D., Li, Y., Rudney, J., Aparicio, C., Fok, A.                                   | The use of micro-CT with image segmentation to quantify leakage in dental restorations                                                                                                                                                              | Dental Materials                   | Serch noise                         |
| 2021 | Castelo R, Attik N, Catirse ABCEB, Pradelle-Plasse N, Tirapelli C, Grosgeat B.                                            | Is there a preferable management for root caries in middle-aged and older adults? A systematic review                                                                                                                                               | Br Dent J                          | Different outcome                   |
| 2019 | Cernigliaro D., Kumar A., Northridge M.E., Wu Y., Troxel A.B., Cunha-Cruz J., Balzer J., Okuji D.M.                       | Caregiver satisfaction with interim silver diamine fluoride applications for their children with caries prior to operating room treatment or sedation                                                                                               | Journal of public health dentistry | Different outcome                   |
| 2015 | Chaple Gil, A.M.                                                                                                          | Effect of the main materials used in dental practice against the formation of bacterial dental plaque                                                                                                                                               | Revista Cubana de Estomatologia    | Serch noise                         |
| 2018 | Chen K.J., Gao S.S., Duangthip D., Lo E.C.M., Chu C.H.                                                                    | The caries-arresting effect of incorporating functionalized tricalcium phosphate into fluoride varnish applied following application of silver nitrate solution in preschool children: Study protocol for a randomized, double-blind clinical trial | Trials                             | Different type of study             |
| 2021 | Chen K.J., Gao S.S., Duangthip D., Lo E.C.M., Chu C.H.                                                                    | Randomized Clinical Trial on Sodium Fluoride with Tricalcium Phosphate                                                                                                                                                                              | Journal of Dental Research         | Serch noise                         |
| 2020 | Chen KF, Milgrom P, Lin YS.                                                                                               | Silver Diamine Fluoride in Children Using Physiologically Based PK Modeling                                                                                                                                                                         | J Dent Res                         | Different outcome                   |

|      |                                                                                                          |                                                                                                                                                                                                                          |                               |                          |
|------|----------------------------------------------------------------------------------------------------------|--------------------------------------------------------------------------------------------------------------------------------------------------------------------------------------------------------------------------|-------------------------------|--------------------------|
| 2018 | Chen KJ, Gao SS, Duangthip D, Lo ECM, Chu CH.                                                            | Managing Early Childhood Caries for Young Children in China                                                                                                                                                              | Healthcare (Basel)            | Different type of study  |
| 2012 | Cheng, L., Weir, M.D., Xu, H.H.K., Antonucci, J.M., Kraigsley, A.M., Lin, N.J., Lin-Gibson, S., Zhou, X. | Antibacterial amorphous calcium phosphate nanocomposites with a quaternary ammonium dimethacrylate and silver nanoparticles                                                                                              | Dental Materials              | Serch noise              |
| 2017 | Chhokar SK, Laughter L, Rowe DJ.                                                                         | Perceptions of Registered Dental Hygienists in Alternative Practice Regarding Silver Diamine Fluoride                                                                                                                    | J Dent Hyg                    | Different type of study  |
| 2018 | Chi DL, Milgrom P, Gillette J.                                                                           | Engaging Stakeholders in Patient-Centered Outcomes Research Regarding School-Based Sealant Programs                                                                                                                      | J Dent Hyg                    | Serch noise              |
| 2011 | Chibinski A.C., Stanislawczuk R., Roderjan D.A., Loguercio A.D., Wambier D.S., Grande R.H.M., Reis A.    | Clinical versus laboratory adhesive performance to wet and dry demineralized primary dentin                                                                                                                              | American Journal of Dentistry | Serch noise              |
| 2017 | Chibinski A.C., Wambier L.M., Feltrin J., Loguercio A.D., Wambier D.S., Reis A.                          | Silver Diamine Fluoride Has Efficacy in Controlling Caries Progression in Primary Teeth: A Systematic Review and Meta-Analysis                                                                                           | Caries research               | Different type of study  |
| 2015 | Chu C.-H., Gao S.S., Li S.K.Y., Wong M.C.M., Lo E.C.M.                                                   | The effectiveness of the biannual application of silver nitrate solution followed by sodium fluoride varnish in arresting early childhood caries in preschool children: Study protocol for a randomised controlled trial | Trials                        | Different type of study  |
| 2008 | Chu C.H., Lo E.C.M.                                                                                      | Microhardness of dentine in primary teeth after topical fluoride applications                                                                                                                                            | Journal of Dentistry          | Different outcome        |
| 2002 | Chu C.H., Lo E.C.M., Lin H.C.                                                                            | Effectiveness of silver diamine fluoride and sodium fluoride varnish in arresting dentin caries in Chinese pre-school children                                                                                           | Journal of Dental Research    | Different outcome        |
| 2014 | Chu CH, Lee AH, Zheng L, Mei ML, Chan GC.                                                                | Arresting rampant dental caries with silver diamine fluoride in a young teenager suffering from chronic oral graft versus host disease post-bone marrow transplantation: a case report                                   | BMC Res Notes                 | Different type of sample |
| 2008 | Chu CH, Lo EC.                                                                                           | Promoting caries arrest in children with silver diamine fluoride: a review                                                                                                                                               | Oral Health Prev Dent         | Different type of study  |

|      |                                                                                                                                |                                                                                                                                                                                              |                                                   |                         |
|------|--------------------------------------------------------------------------------------------------------------------------------|----------------------------------------------------------------------------------------------------------------------------------------------------------------------------------------------|---------------------------------------------------|-------------------------|
| 2012 | Chu CH, Mei L, Seneviratne CJ, Lo EC.                                                                                          | Effects of silver diamine fluoride on dentine carious lesions induced by Streptococcus mutans and Actinomyces naeslundii biofilms                                                            | Int J Paediatr Dent                               | Different type of study |
| 2003 | Civelek, A., Ersoy, M., L'Hotelier, E., Soymano, M., Say, E.C.                                                                 | Polymerization shrinkage and microleakage in Class II cavities of various resin composites                                                                                                   | Operative Dentistry                               | Serch noise             |
| 2020 | Colombini-Ishikiriana BL, Dionisio TJ, Garbieri TF, da Silva RA, Machado MAAM, de Oliveira SHP, Lara VS, Greene AS, Santos CF. | What is the response profile of deciduous pulp fibroblasts stimulated with E. coli LPS and E. faecalis LTA?                                                                                  | BMC Immunol                                       | Different type of study |
| 2017 | Contreras V, Toro MJ, Elias-Boneta AR, Encarnacion-Burgos A.                                                                   | Effectiveness of silver diamine fluoride in caries prevention and arrest: a systematic literature review                                                                                     | Gen Dent                                          | Different type of study |
| 2020 | Correa-Faria, P., Viana, K.A., Raggio, D.P., Hosey, M.T., Costa, L.R.                                                          | Recommended procedures for the management of early childhood caries lesions-A scoping review by the Children Experiencing Dental Anxiety: Collaboration on Research and Education (CEDACORE) | BMC Oral Health                                   | Different type of study |
| 2011 | Costa JF, Siqueira WL, Loguercio AD, Reis A, Oliveira Ed, Alves CM, Bauer JR, Grande RH.                                       | Characterization of aqueous silver nitrate solutions for leakage tests                                                                                                                       | J Appl Oral Sci                                   | Serch noise             |
| 2013 | Craig G.G., Powell K.R., Price C.A.                                                                                            | Clinical evaluation of a modified silver fluoride application technique designed to facilitate lesion assessment in outreach programs.                                                       | BMC oral health                                   | Serch noise             |
| 1981 | Craig, G.G., Powell, K.R., Cooper, M.H.                                                                                        | Caries progression in primary molars: 24-month results from a minimal treatment programme                                                                                                    | Community Dentistry and Oral Epidemiology         | Different outcome       |
| 2018 | Crete P, Boyd LD, Fitzgerald JK, LaSpina LM.                                                                                   | Access to Preventive Oral Health Services for Homebound Populations: A pilot program                                                                                                         | J Dent Hyg                                        | Serch noise             |
| 2021 | Crisp J., Mihas P., Sanders A.E., Divaris K., Wright J.T.                                                                      | Influences on dentists' adoption of nonsurgical caries management techniques: A qualitative study                                                                                            | Journal of the American Dental Association (1939) | Different type of study |
| 2020 | Croll TP, Berg J.                                                                                                              | Delivery Methods of Silver Diammine Fluoride to Contacting Proximal Tooth Surfaces and History of Silver in Dentistry                                                                        | Compend Contin Educ Dent                          | Different type of study |

|      |                                                                          |                                                                                                                           |                                                   |                         |
|------|--------------------------------------------------------------------------|---------------------------------------------------------------------------------------------------------------------------|---------------------------------------------------|-------------------------|
| 2021 | Crowder L.                                                               | Management options of early childhood caries                                                                              | Evid Based Dent                                   | Different type of study |
| 2020 | Crystal Y.O., Janal M.N., Yim S., Nelson T.                              | Teaching and utilization of silver diamine fluoride and Hall-style crowns in US pediatric dentistry residency programs    | Journal of the American Dental Association (1939) | Different outcome       |
| 2019 | Crystal Y.O., Rabieh S., Janal M.N., Rasamimari S., Bromage T.G.         | Silver and fluoride content and short-term stability of 38% silver diamine fluoride                                       | Journal of the American Dental Association (1939) | Different outcome       |
| 2018 | Crystal YO, Chaffee BW.                                                  | Silver Diamine Fluoride is Effective in Arresting Caries Lesions in Primary Teeth                                         | J Evid Based Dent Pract                           | Different type of study |
| 2017 | Crystal YO, Janal MN, Hamilton DS, Niederman R.                          | Parental perceptions and acceptance of silver diamine fluoride staining                                                   | J Am Dent Assoc                                   | Different outcome       |
| 2019 | Crystal YO, Niederman R.                                                 | Evidence-Based Dentistry Update on Silver Diamine Fluoride                                                                | Dent Clin North Am                                | Different type of study |
| 2016 | Crystal YO, Niederman R.                                                 | Silver Diamine Fluoride Treatment Considerations in Children's Caries Management                                          | Pediatr Dent                                      | Different type of study |
| 2019 | Crystal, Y.O.                                                            | Silver diamine fluoride (SDF): Its role in caries management                                                              | Dental Update                                     | Different type of study |
| 2019 | Crystal, Y.O., Kreider, B., Raveis, V.H.                                 | Parental expressed concerns about silver diamine fluoride (SDF) treatment                                                 | Journal of Clinical Pediatric Dentistry           | Different outcome       |
| 2021 | Cunha-Cruz J, Pires Dos Santos AP.                                       | Professionally and Self-Applied Fluorides are Effective in Preventing Dental Root Caries                                  | J Evid Based Dent Pract                           | Serch noise             |
| 2021 | da Cunha WA, Palma LF, Shitsuka C, CorrÃªa FNP, Duarte DA, CorrÃªa MSNP. | Efficacy of silver diamine fluoride and sodium fluoride in inhibiting enamel erosion: an ex vivo study with primary teeth | Eur Arch Paediatr Dent                            | Different type of study |

|      |                                                                                                                                               |                                                                                                                                                                            |                                             |                          |
|------|-----------------------------------------------------------------------------------------------------------------------------------------------|----------------------------------------------------------------------------------------------------------------------------------------------------------------------------|---------------------------------------------|--------------------------|
| 2020 | Dang C, Cornick CL, Tabrizi M, Kaufman L, Soto A, Smith BM, Ribeiro APD, Tobey T, Capin OR, Scully A, Prince D, Xie XJ, Marchini L.           | Assessment of knowledge and perception about silver diamine fluoride (SDF) for treating older adults among graduating dental students                                      | J Dent Educ                                 | Different type of sample |
| 2020 | Davis M.R., Johnson E.L., Meyer B.D.                                                                                                          | Comparing Dental Treatment between Children Receiving and not Receiving Silver Diamine Fluoride                                                                            | The Journal of clinical pediatric dentistry | Different outcome        |
| 2014 | De Alencar, N.A., Fidalgo, T.K.S., Cajazeira, M.R.R., Maia, L.C.                                                                              | Influence of the number of adhesive layers on adhesive interface properties under cariogenic challenge using streptococcus mutans                                          | Journal of Adhesive Dentistry               | Serch noise              |
| 2020 | de Siqueira, F.S.F., Morales, L.A.R., Granja, M.C.P., de Oliveira de Melo, B., Monteiro-Neto, V., Reis, A., Cardenas, A.F.M., Loguercio, A.D. | Effect of silver diamine fluoride on the bonding properties to caries-affected dentin                                                                                      | Journal of Adhesive Dentistry               | Different outcome        |
| 2021 | de Souza BM, Silva MS, Braga AS, Bueno PSK, da Silva Santos PS, Buzalaf MAR, Magalhães AC.                                                    | Protective effect of titanium tetrafluoride and silver diamine fluoride on radiation-induced dentin caries in vitro                                                        | Sci Rep                                     | Different outcome        |
| 2009 | Deery, C.                                                                                                                                     | Silver lining for caries cloud?                                                                                                                                            | Evidence-Based Dentistry                    | Different type of study  |
| 2006 | Delbem, A.C.B., Bergamaschi, M., Sassaki, K.T., Cunha, R.F.                                                                                   | Effect of fluoridated varnish and silver diamine fluoride solution on enamel demineralization: pH-cycling study                                                            | Journal of Applied Oral Science             | Different type of study  |
| 2021 | Detsomboonrat, P., Thongmak, P., Lertpayab, P., Aiamsri, W., Soompon, S.                                                                      | Optimal concentration of potassium iodide to reduce the black staining of silver diamine fluoride                                                                          | Journal of Dental Sciences                  | Different outcome        |
| 2016 | Deutsch A.                                                                                                                                    | An alternate technique of care using silver fluoride followed by stannous fluoride in the management of root caries in aged care                                           | Spec Care Dentist                           | Different type of sample |
| 2018 | Deutsch AA, Craig GG.                                                                                                                         | Unexpected sequel to silver fluoride followed by stannous fluoride treatment of root stumps supporting an overlay denture in an aged-care patient                          | Spec Care Dentist                           | Different outcome        |
| 2018 | Devji T.                                                                                                                                      | Silver diamine fluoride is probably more effective than atraumatic restorative treatment, fluoride varnish, or no treatment for controlling caries progression in children | J Am Dent Assoc                             | Different type of study  |

|      |                                                                                             |                                                                                                                                             |                                          |                         |
|------|---------------------------------------------------------------------------------------------|---------------------------------------------------------------------------------------------------------------------------------------------|------------------------------------------|-------------------------|
| 1998 | Dionysopoulos P, Kotsanos N, Papadogiannis Y, Konstantinidis A.                             | Artificial caries formation around fluoride-releasing restorations in roots                                                                 | J Oral Rehabil                           | Serch noise             |
| 1994 | Dionysopoulos, P., Kotsanos, N., Koliniotou-Koubia, Papagodiannis, Y.                       | Secondary caries formation in vitro around fluoride-releasing restorations.                                                                 | Operative dentistry                      | Serch noise             |
| 1991 | Dodds, M.W., Edgar, W.M.                                                                    | Interactions between fluoride and plaque in the remineralization of enamel caries-like lesions.                                             | American journal of dentistry            | Different outcome       |
| 1990 | Donly, K.J., Wild, T.W., Jensen, M.E.                                                       | Posterior composite Class II restorations: in vitro comparison of preparation designs and restoration techniques                            | Dental Materials                         | Serch noise             |
| 2012 | Dos Santos Jr., V.E., De Vasconcelos, F.M.N., De Souza, P.R., Ribeiro, A.G., Rosenblatt, A. | Adverse events on the use of interim therapeutic in schoolchildren: Silver diamine fluoride interim therapeutic restorative - A pilot study | Revista Odonto Ciencia                   | Different outcome       |
| 2017 | Duangthip D, Chen KJ, Gao SS, Lo ECM, Chu CH.                                               | Managing Early Childhood Caries with Atraumatic Restorative Treatment and Topical Silver and Fluoride Agents                                | Int J Environ Res Public Health          | Different type of study |
| 2015 | Duangthip D, Jiang M, Chu CH, Lo EC.                                                        | Non-surgical treatment of dentin caries in preschool children--systematic review                                                            | BMC Oral Health                          | Different type of study |
| 2018 | Duangthip D., Fung M.H.T., Wong M.C.M., Chu C.H., Lo E.C.M.                                 | Adverse Effects of Silver Diamine Fluoride Treatment among Preschool Children                                                               | Journal of dental research               | Different outcome       |
| 2019 | Duangthip D., Gao S.S., Chen K.J., Lo E.C.M., Chu C.H.                                      | Oral health-related quality of life of preschool children receiving silver diamine fluoride therapy: A prospective 6-month study            | Journal of dentistry                     | Different outcome       |
| 2016 | Duangthip, D., Jiang, M., Chu, C.H., Lo, E.C.M.                                             | Restorative approaches to treat dentin caries in preschool children: Systematic review                                                      | European Journal of Paediatric Dentistry | Different type of study |
| 2007 | Duarte Jr., S., Dinelli, W., Carmona Da Silva, M.H.                                         | Influence of resin composite insertion technique in preparations with a high C-factor                                                       | Quintessence International               | Serch noise             |

|      |                                                                                                                                  |                                                                                                                                                                          |                                              |                         |
|------|----------------------------------------------------------------------------------------------------------------------------------|--------------------------------------------------------------------------------------------------------------------------------------------------------------------------|----------------------------------------------|-------------------------|
| 2008 | Duarte Jr., S., Saad, J.R.C.                                                                                                     | Marginal adaptation of Class 2 adhesive restorations                                                                                                                     | Quintessence International                   | Serch noise             |
| 2012 | Duffin, S.                                                                                                                       | Back to the future: the medical management of caries introduction.                                                                                                       | Journal of the California Dental Association | Different type of study |
| 2021 | Durrani, F., Painuly, H., Shukla, A., Nahid, R., Pandey, S.                                                                      | Terminal dentition to functional esthetic full-mouth implant reconstruction: Evidence-based approach                                                                     | Journal of Indian Society of Periodontology  | Serch noise             |
| 2008 | Eden E., Topaloglu-Ak V., Cuijpers V., Frencken J.E.                                                                             | Micro-CT for measuring marginal leakage of Class II resin composite restorations in primary molars prepared in vivo                                                      | American Journal of Dentistry                | Different type of study |
| 2021 | Erdwey D, Meyer-Lueckel H, Esteves-Oliveira M, Apel C, Wierichs RJ.                                                              | Demineralization Inhibitory Effects of Highly Concentrated Fluoride Dentifrice and Fluoride Gels/Solutions on Sound Dentin and Artificial Dentin Caries Lesions in vitro | Caries Res                                   | Different type of study |
| 2021 | Ezzeldin, T., Al-Awasi, K.A., Bader, R.M., Alshaikhi, A.Y., Hakami, A.H., Siddiqui, I.A., Almulhim, A.A., Alsubaie, T.M.         | A Study to assess the awareness and use of Silver Diammine Fluoride and Hall Technique among dental professionals and dental students in the Eastern Province            | Saudi Dental Journal                         | Different type of study |
| 2020 | Fakhraddin KS, Egusa H, Ngo HC, Panduwawala C, Pesee S, Samaranayake LP.                                                         | Clinical efficacy and the antimicrobial potential of silver formulations in arresting dental caries: a systematic review                                                 | BMC Oral Health                              | Different type of study |
| 2020 | Fakhraddin KS, Egusa H, Ngo HC, Panduwawala C, Pesee S, Venkatachalam T, Samaranayake LP.                                        | Silver diamine fluoride (SDF) used in childhood caries management has potent antifungal activity against oral Candida species                                            | BMC Microbiol                                | Different outcome       |
| 2014 | Faller, R.V., Eversole, S.L., Saunders-Burkhardt, K.                                                                             | Protective benefits of a stabilised stannous-containing fluoride dentifrice against erosive acid damage.                                                                 | International dental journal                 | Serch noise             |
| 2011 | Ferreira, S.Q., Da Costa, T.R.F., Klein-Janior, C.A., De Lourdes Rodrigues Accorinte, M., Meier, M.M., Loguercio, A.D., Reis, A. | Improvement of exposure times: Effects on adhesive properties and resin-dentin bond strengths of etch-and-rinse adhesives                                                | Journal of Adhesive Dentistry                | Serch noise             |
| 2020 | Firouzmandi M, Mohaghegh M, Jafarpisheh M.                                                                                       | Effect of silver diamine fluoride on the bond durability of normal and carious dentin                                                                                    | J Clin Exp Dent                              | Different type of study |



|      |                                                                                                 |                                                                                                                                                                              |                                                            |                         |
|------|-------------------------------------------------------------------------------------------------|------------------------------------------------------------------------------------------------------------------------------------------------------------------------------|------------------------------------------------------------|-------------------------|
| 2019 | Firouzmandi, M., Shafiei, F., Jowkar, Z., Nazemi, F.                                            | Effect of Silver Diamine Fluoride and Proanthocyanidin on Mechanical Properties of Caries-Affected Dentin                                                                    | European Journal of Dentistry                              | Different type of study |
| 1990 | FORSS, H., SEPPÄ, L.                                                                            | Prevention of enamel demineralization adjacent to glass ionomer filling materials                                                                                            | European Journal of Oral Sciences                          | Serch noise             |
| 2018 | Fracasso, M.L.C., Venante, H.S., Santin, G.C., Salles, C.L.F., Provenzano, M.G.A., Maciel, S.M. | Performance of preventive methods applied to the occlusal surface of primary teeth: A randomized clinical study                                                              | Pesquisa Brasileira em Odontopediatria e Clínica Integrada | Different outcome       |
| 1966 | Francis, M.D.                                                                                   | The effectiveness of anticaries agents in rats using an incipient carious lesion method                                                                                      | Archives of Oral Biology                                   | Different type of study |
| 1966 | Francis, M.D., Briner, W.W.                                                                     | The development and regression of hypomineralized areas of rat molars                                                                                                        | Archives of Oral Biology                                   | Different type of study |
| 2020 | François, P., Greenwall-Cohen, J., Goff, S.L., Ruscassier, N., Attal, J.-P., Dursun, E.         | Shear bond strength and interfacial analysis of high-viscosity glass ionomer cement bonded to dentin with protocols including silver diamine fluoride                        | Journal of Oral Science                                    | Different outcome       |
| 2017 | Frencken JE.                                                                                    | How useful is restorative care in the primary dentition?                                                                                                                     | Ned Tijdschr Tandheelkd                                    | Different type of study |
| 2020 | Froehlich, T.T., Rocha, R.D.O., Botton, G.                                                      | Does previous application of silver diamine fluoride influence the bond strength of glass ionomer cement and adhesive systems to dentin? Systematic review and meta-analysis | International Journal of Paediatric Dentistry              | Different type of study |
| 1977 | Gallagher, I.H.C., Cutress, T.W.                                                                | The effect of trace elements on the growth and fermentation by oral Streptococci and Actinomyces                                                                             | Archives of Oral Biology                                   | Serch noise             |
| 2021 | Gao S.S., Zheng F.M., Chen K.J., Duangthip D., Lo E.C.M., Chu C.H.                              | Comparing two fluoride therapies for caries management in young children: study protocol for a randomised clinical trial                                                     | Trials                                                     | Different type of study |
| 2016 | Gao SS, Zhang S, Mei ML, Lo EC, Chu CH.                                                         | Caries remineralisation and arresting effect in children by professionally applied fluoride treatment - a systematic review                                                  | BMC Oral Health                                            | Different type of study |

|      |                                                                                                  |                                                                                                                                      |                                                            |                         |
|------|--------------------------------------------------------------------------------------------------|--------------------------------------------------------------------------------------------------------------------------------------|------------------------------------------------------------|-------------------------|
| 2018 | Gao SS, Zhao IS, Duffin S, Duangthip D, Lo ECM, Chu CH.                                          | Revitalising Silver Nitrate for Caries Management                                                                                    | Int J Environ Res Public Health                            | Serch noise             |
| 2016 | Gao SS, Zhao IS, Hiraishi N, Duangthip D, Mei ML, Lo ECM, Chu CH.                                | Clinical Trials of Silver Diamine Fluoride in Arresting Caries among Children: A Systematic Review                                   | JDR Clin Trans Res                                         | Different type of study |
| 2019 | Garg S., Sadr A., Chan D.                                                                        | Potassium Iodide Reversal of Silver Diamine Fluoride Staining: A Case Report                                                         | Operative dentistry                                        | Different outcome       |
| 2020 | Garrastazu M.D., Mathias-Santamaria I.F., Rocha R.S., Diniz M.B., Caneppele T.M.F., Bresciani E. | Three-Month Effect of Silver Diamine Fluoride (SDF) in Salivary Levels of Streptococcus Mutans in Children. An Exploratory Trial     | Oral health & preventive dentistry                         | Different outcome       |
| 2018 | Gastemeyer G, Kohls A, Paris S, Schwendicke F.                                                   | Root caries prevention via sodium fluoride, chlorhexidine and silver diamine fluoride in vitro                                       | Odontology                                                 | Serch noise             |
| 2017 | Gastemeyer G, Schulze F, Paris S, Schwendicke F.                                                 | Arrest of Root Carious Lesions via Sodium Fluoride, Chlorhexidine and Silver Diamine Fluoride In Vitro                               | Materials (Basel)                                          | Different outcome       |
| 2012 | Geerts, S., Bolette, A., Seidel, L., Guaders, A.                                                 | An in vitro evaluation of leakage of two etch and rinse and two self-etch adhesives after thermocycling                              | International Journal of Dentistry                         | Serch noise             |
| 2001 | Ghersel, E.L., Guedes-Pinto, A.C., Ciamponi, A.L.                                                | Effect of the storage method on microleakage of primary teeth restored with different bonding systems: in vitro study                | Pesquisa odontológica brasileira = Brazilian oral research | Different type of study |
| 2018 | Giusti L, Steinborn C, Steinborn M.                                                              | Use of silver diamine fluoride for the maintenance of dental prostheses in a high caries-risk patient: A medical management approach | J Prosthet Dent                                            | Different type of study |
| 2001 | Gladys, S., Van Meerbeek, B., Lambrechts, P., Vanherle, G.                                       | Microleakage of adhesive restorative materials                                                                                       | American Journal of Dentistry                              | Serch noise             |
| 2013 | Gluzman R, Katz RV, Frey BJ, McGowan R.                                                          | Prevention of root caries: a literature review of primary and secondary preventive agents                                            | Spec Care Dentist                                          | Serch noise             |

|      |                                                                |                                                                                                                                                             |                           |                         |
|------|----------------------------------------------------------------|-------------------------------------------------------------------------------------------------------------------------------------------------------------|---------------------------|-------------------------|
| 2019 | Gold J.                                                        | Silver Diamine Fluoride May Prevent and Arrest Root Caries in Older Adults                                                                                  | J Evid Based Dent Pract   | Different outcome       |
| 2018 | Gold J.                                                        | Silver Diamine Fluoride Arrests Caries in Primary Teeth                                                                                                     | J Evid Based Dent Pract   | Different type of study |
| 2020 | Gold J.                                                        | Silver Diamine Fluoride Prevents Caries in Primary Teeth Superior to No Treatment, Placebo, or Fluoride Varnish                                             | J Evid Based Dent Pract   | Different type of study |
| 2018 | Gordon NB.                                                     | Silver Diamine Fluoride Staining is Acceptable for Posterior Primary Teeth and Is Preferred Over Advanced Pharmacologic Behavior Management by Many Parents | J Evid Based Dent Pract   | Different outcome       |
| 1996 | Gotjamanos T.                                                  | Pulp response in primary teeth with deep residual caries treated with silver fluoride and glass ionomer cement ('atraumatic' technique)                     | Australian dental journal | Different outcome       |
| 1997 | Gotjamanos T.                                                  | Safety issues related to the use of silver fluoride in paediatric dentistry                                                                                 | Aust Dent J               | Different type of study |
| 2000 | Gotjamanos, T., Ma, P.                                         | Potential of 4 per cent silver fluoride to induce fluorosis in rats: Clinical implications                                                                  | Australian Dental Journal | Different outcome       |
| 1998 | Gotjamanos, T., Orton, V.                                      | Abnormally high fluoride levels in commercial preparations of 40 per cent silver fluoride solution: Contraindications for use in children                   | Australian Dental Journal | Different outcome       |
| 2021 | Grandjean ML, Maccarone NR, McKenna G, Maller F, Srinivasan M. | Silver Diamine Fluoride (SDF) in the management of root caries in elders: a systematic review and meta-analysis                                             | Swiss Dent J              | Different outcome       |
| 1989 | Green, E.                                                      | A clinical evaluation of two methods of caries prevention in new-erupted first permanent molars                                                             | Australian Dental Journal | Different outcome       |
| 2020 | Greenwall-Cohen J., Greenwall L., Barry S.                     | Silver diamine fluoride - an overview of the literature and current clinical techniques                                                                     | British dental journal    | Different type of study |

|      |                                                                                                      |                                                                                                                                                                                     |                                                   |                          |
|------|------------------------------------------------------------------------------------------------------|-------------------------------------------------------------------------------------------------------------------------------------------------------------------------------------|---------------------------------------------------|--------------------------|
| 2015 | Gregory D, Hyde S.                                                                                   | Root Caries in Older Adults                                                                                                                                                         | J Calif Dent Assoc                                | Serch noise              |
| 2017 | Gugnani N, Gugnani S.                                                                                | Remineralisation and arresting caries in children with topical fluorides                                                                                                            | Evid Based Dent                                   | Different type of study  |
| 2021 | Haiat A, Ngo HC, Samaranayake LP, Fakhruddin KS.                                                     | The effect of the combined use of silver diamine fluoride and potassium iodide in disrupting the plaque biofilm microbiome and alleviating tooth discoloration: A systematic review | PLoS One                                          | Different type of study  |
| 1991 | HALS, E.                                                                                             | Columna like structures of human dentin in carious and artificial lesions                                                                                                           | European Journal of Oral Sciences                 | Different type of study  |
| 2015 | Hamama, H.H., Yiu, C.K., Burrow, M.F.                                                                | Effect of silver diamine fluoride and potassium iodide on residual bacteria in dentinal tubules                                                                                     | Australian Dental Journal                         | Different outcome        |
| 2021 | Hamdy D, Giraki M, Abd Elaziz A, Badran A, Allam G, Ruettermann S.                                   | Laboratory evaluation of the potential masking of color changes produced by silver diamine fluoride in primary molars                                                               | BMC Oral Health                                   | Different type of study  |
| 2020 | Hammersmith K.J., DePalo J.R., Casamassimo P.S., MacLean J.K., Peng J.                               | Silver Diamine Fluoride and Fluoride Varnish May Halt Interproximal Caries Progression in the Primary Dentition                                                                     | The Journal of clinical pediatric dentistry       | Different type of sample |
| 2019 | Haque N, Widera D, Abu Kasim NH.                                                                     | Stem Cells from Human Extracted Deciduous Teeth Expanded in Foetal Bovine and Human Sera Express Different Paracrine Factors After Exposure to Freshly Prepared Human Serum         | Adv Exp Med Biol                                  | Serch noise              |
| 1990 | HARSTEDABINDSLEV, P., LARSEN, M.J.                                                                   | Release of fluoride from conventional and metal-reinforced glass-ionomer cements                                                                                                    | European Journal of Oral Sciences                 | Serch noise              |
| 2012 | Hasegawa T, Chosa N, Asakawa T, Yoshimura Y, Fujihara Y, Kitamura T, Tanaka M, Ishisaki A, Mitome M. | Differential effects of TGF-beta 1 and FGF-2 on SDF-1 alfa expression in human periodontal ligament cells derived from deciduous teeth in vitro                                     | Int J Mol Med                                     | Serch noise              |
| 1989 | Hattab, F.N., Mok, N.Y., Agnew, E.C.                                                                 | Artificially formed carieslike lesions around restorative materials.                                                                                                                | Journal of the American Dental Association (1939) | Different type of study  |

|      |                                                                               |                                                                                                                                                           |                                                                                                |                         |
|------|-------------------------------------------------------------------------------|-----------------------------------------------------------------------------------------------------------------------------------------------------------|------------------------------------------------------------------------------------------------|-------------------------|
| 2015 | Hayes M.                                                                      | Topical agents for root caries prevention                                                                                                                 | Evid Based Dent                                                                                | Different outcome       |
| 2008 | Heintze, S., Forjanic, M., Cavalleri, A.                                      | Microleakage of class II restorations with different tracers - Comparison with SEM quantitative analysis                                                  | Journal of Adhesive Dentistry                                                                  | Serch noise             |
| 2017 | Hendre AD, Taylor GW, ChÃ¡vez EM, Hyde S.                                     | A systematic review of silver diamine fluoride: Effectiveness and application in older adults                                                             | Gerodontology                                                                                  | Different type of study |
| 2020 | Hiremath A.M., Anbu V., Kuduruthullah S., Khalil E., Elsahn N.A., Samuel S.R. | Acceptability of silver diamine fluoride as interim measure towards untreated dental caries and its impact on ohrqol among children with HIV: Pilot study | Indian journal of dental research : official publication of Indian Society for Dental Research | Different outcome       |
| 2013 | Hooshmand, T., Tabari, N., Keshvad, A.                                        | Marginal leakage and microhardness evaluation of low-shrinkage resin-based restorative materials                                                          | General Dentistry                                                                              | Serch noise             |
| 2016 | Horst JA, Ellenikiotis H, Milgrom PL.                                         | UCSF Protocol for Caries Arrest Using Silver Diamine Fluoride: Rationale, Indications and Consent                                                         | J Calif Dent Assoc                                                                             | Different type of study |
| 2019 | Horst JA, Heima M.                                                            | Prevention of Dental Caries by Silver Diamine Fluoride                                                                                                    | Compend Contin Educ Dent                                                                       | Different type of study |
| 2018 | Horst JA, Tanzer JM, Milgrom PM.                                              | Fluorides and Other Preventive Strategies for a Tooth Decay                                                                                               | Dent Clin North Am                                                                             | Different type of study |
| 2018 | Horst JA.                                                                     | Silver Fluoride as a Treatment for Dental Caries                                                                                                          | Adv Dent Res                                                                                   | Different type of study |
| 1985 | Hosoya Y.                                                                     | Effect of acid etchants and restorative resin penetration into primary dentin after diammine silver fluoride application (I)                              | Shoni Shikagaku Zasshi                                                                         | Different outcome       |
| 2010 | Hosoya, Y., Ando, S., Yamaguchi, K., Oooka, S., Miyazaki, M., Tay, F.R.       | Quality of the interface of primary tooth dentin bonded with antibacterial fluoride-releasing adhesive                                                    | Journal of Dentistry                                                                           | Serch noise             |

|      |                                                                                                                                |                                                                                                                                                                            |                                                   |                         |
|------|--------------------------------------------------------------------------------------------------------------------------------|----------------------------------------------------------------------------------------------------------------------------------------------------------------------------|---------------------------------------------------|-------------------------|
| 2012 | Hosoya, Y., Watanabe, E., Tadokoro, K., Inoue, T., Miyazaki, M., Tay, F.R.                                                     | Effects of ammonium hexafluorosilicate application on demineralized enamel and dentin of primary teeth.                                                                    | Journal of oral science                           | Serch noise             |
| 2018 | Hu S, Meyer B, Duggal M.                                                                                                       | A silver renaissance in dentistry                                                                                                                                          | Eur Arch Paediatr Dent                            | Different type of study |
| 2020 | Hu S., Meyer B., Lai B.W.P., Chay P.L., Tong H.J.                                                                              | Parental acceptance of silver diammine fluoride in children with autism spectrum disorder                                                                                  | International journal of paediatric dentistry     | Different outcome       |
| 2020 | Huebner C.E., Milgrom P., Cunha-Cruz J., Scott J., Spiekerman C., Ludwig S., Mitchell M., Allen G., Dysert J., Shirtcliff R.M. | Parents' Satisfaction with Silver Diamine Fluoride Treatment of Carious Lesions in Children                                                                                | Journal of dentistry for children (Chicago, Ill.) | Different outcome       |
| 2019 | Ishiguro, T., Mayanagi, G., Azumi, M., Otani, H., Fukushima, A., Sasaki, K., Takahashi, N.                                     | Sodium fluoride and silver diamine fluoride-coated tooth surfaces inhibit bacterial acid production at the bacteria/tooth interface                                        | Journal of Dentistry                              | Different outcome       |
| 2020 | Jabin Z, Vishnupriya V, Agarwal N, Nasim I, Jain M, Sharma A.                                                                  | Effect of 38% silver diamine fluoride on control of dental caries in primary dentition: A Systematic review                                                                | J Family Med Prim Care                            | Different type of study |
| 2021 | Janakiram C, Ramanarayanan V, Devan I.                                                                                         | Effectiveness of Silver Diammine Fluoride Applications for Dental Caries Cessation in Tribal Preschool Children in India: Study Protocol for a Randomized Controlled Trial | Methods Protoc                                    | Different type of study |
| 2021 | Jasulaityte L, Burgersdijk RCW.                                                                                                | Non-restorative cavity treatment: from guidelines to the practice                                                                                                          | Ned Tijdschr Tandheelkd                           | Different type of study |
| 2020 | Jiang M, Mei ML, Wong M, Chu CH, Lo E.                                                                                         | Influence of Silver Diamine Fluoride Treatment on the Microtensile Bond Strength of Glass Ionomer Cement to Sound and Carious Dentin                                       | Oper Dent                                         | Different outcome       |
| 2019 | Jiang M., Wong M.C.M., Chu C.H., Dai L., Lo E.C.M.                                                                             | Effects of restoring SDF-treated and untreated dentine caries lesions on parental satisfaction and oral health related quality of life of preschool children               | Journal of dentistry                              | Different outcome       |
| 2020 | Jiang M., Wong M.C.M., Chu C.H., Dai L., Lo E.C.M.                                                                             | A 24-month randomized controlled trial on the success rates of restoring untreated and SDF-treated dentine caries lesions in primary teeth with the ART approach           | Journal of dentistry                              | Different outcome       |

|      |                                                                               |                                                                                                                                                                             |                                    |                         |
|------|-------------------------------------------------------------------------------|-----------------------------------------------------------------------------------------------------------------------------------------------------------------------------|------------------------------------|-------------------------|
| 2021 | Jiang M., Xie Q.Y., Wong M.C.M., Chu C.H., Lo E.C.M.                          | Association between dental conditions, silver diamine fluoride application, parental satisfaction, and oral health-related quality of life of preschool children            | Clinical oral investigations       | Different outcome       |
| 2021 | Jiang, C.M., Duangthip, D., Chan, A.K.Y., Tamrakar, M., Lo, E.C.M., Chu, C.H. | Global research interest regarding silver diamine fluoride in dentistry: A bibliometric analysis                                                                            | Journal of Dentistry               | Different type of study |
| 2012 | Jiang, L., Peng, W.-W., Li, L.-F., Yang, Y., Zhu, Y.-Q.                       | Isolation and identification of cxcr4-positive cells from human dental pulp cells                                                                                           | Journal of Endodontics             | Search noise            |
| 2019 | Johhnson B., Serban N., Griffin P.M., Tomar S.L.                              | Projecting the economic impact of silver diamine fluoride on caries treatment expenditures and outcomes in young U.S. children                                              | Journal of public health dentistry | Different outcome       |
| 2019 | Karched M, Ali D, Ngo H.                                                      | In vivo antimicrobial activity of silver diamine fluoride on carious lesions in dentin                                                                                      | J Oral Sci                         | Different outcome       |
| 2005 | Kawasaki A, Suge T, Ishikawa K, Ozaki K, Matsuo T, Ebisu S.                   | Ammonium hexafluorosilicate increased acid resistance of bovine enamel and dentine                                                                                          | J Mater Sci Mater Med              | Different outcome       |
| 2018 | Khoroushi, M., Etemadi, S., Kheir, M.                                         | Marginal Leakage of Class V Composite Resin Restorations                                                                                                                    | Dental Hypotheses                  | Search noise            |
| 2016 | Kim JH, Kim GH, Kim JW, Pyeon HJ, Lee JC, Lee G, Nam H.                       | In Vivo Angiogenic Capacity of Stem Cells from Human Exfoliated Deciduous Teeth with Human Umbilical Vein Endothelial Cells                                                 | Mol Cells                          | Search noise            |
| 2021 | Kim S, Nassar M, Tamura Y, Hiraishi N, Jamleh A, Nikaido T, Tagami J.         | The effect of reduced glutathione on the toxicity of silver diamine fluoride in rat pulpal cells                                                                            | J Appl Oral Sci                    | Different outcome       |
| 2016 | Kirschneck, C., Christl, J.-J., Reicheneder, C., Proff, P.                    | Efficacy of fluoride varnish for preventing white spot lesions and gingivitis during orthodontic treatment with fixed appliances: a prospective randomized controlled trial | Clinical Oral Investigations       | Search noise            |
| 1999 | Klein U, Kanellis MJ, Drake D.                                                | Effects of four anticaries agents on lesion depth progression in an in vitro caries model                                                                                   | Pediatr Dent                       | Different type of study |

|      |                                                                             |                                                                                                                                                                  |                                         |                         |
|------|-----------------------------------------------------------------------------|------------------------------------------------------------------------------------------------------------------------------------------------------------------|-----------------------------------------|-------------------------|
| 2010 | Knight GM, McIntyre JM, Craig GG, Mulyani.                                  | Leave decay in my cavity? You must be kidding!                                                                                                                   | Dent Today                              | Serch noise             |
| 2006 | Knight, G.M., McIntyre, J.M., Craig, G.G., Mulyani                          | Ion uptake into demineralized dentine from glass ionomer cement following pretreatment with silver fluoride and potassium iodide                                 | Australian Dental Journal               | Wrong study design      |
| 2007 | Knight, G.M., McIntyre, J.M., Craig, G.G., Mulyani, Zilm, P.S., Gully, N.J. | Differences between normal and demineralized dentine pretreated with silver fluoride and potassium iodide after an in vitro challenge by Streptococcus mutans    | Australian Dental Journal               | Different outcome       |
| 2009 | Knight, G.M., McIntyre, J.M., Craig, G.G., Mulyani, Zilm, P.S., Gully, N.J. | Inability to form a biofilm of Streptococcus mutans on silver fluoride- and potassium iodide-treated demineralized dentin                                        | Quintessence International              | Different outcome       |
| 2005 | Knight, G.M., McIntyre, J.M., Craig, G.G., Mulyani, Zilm, P.S., Gully, N.J. | An in vitro model to measure the effect of a silver fluoride and potassium iodide treatment on the permeability of demineralized dentine to Streptococcus mutans | Australian Dental Journal               | Wrong study design      |
| 2006 | Knight, G.M., McIntyre, J.M., Mulyani                                       | The effect of silver fluoride and potassium iodide on the bond strength of auto cure glass ionomer cement to dentine                                             | Australian Dental Journal               | Different outcome       |
| 2013 | Kolb, A.K., Schmied, K., Faßheber, P., Heinrich-Weltzien, R.                | Preschool children's taste acceptance of highly concentrated fluoride compounds: Effects on nonverbal behavior                                                   | Journal of Clinical Pediatric Dentistry | Serch noise             |
| 2021 | Kopczynski K., Meyer B.D.                                                   | Examining parental treatment decisions within a contemporary pediatric dentistry private practice                                                                | Patient Preference and Adherence        | Serch noise             |
| 2019 | Kuang, B., Zeng, Z., Qin, Q.                                                | Biomechanically stimulated chondrocytes promote osteoclastic bone resorption in the mandibular condyle                                                           | Archives of Oral Biology                | Serch noise             |
| 2002 | Kubo, S., Li, H., Burrow, M.F., Tyas, M.J.                                  | Nanoleakage of dentin adhesive systems bonded to carisolv-treated dentin                                                                                         | Operative Dentistry                     | Serch noise             |
| 1989 | Kubota M.                                                                   | Insolubilization of deciduous tooth enamel by the two-step method with fluoride and lanthanum treatment                                                          | Kanagawa Shigaku                        | Different type of study |



|      |                                                                                                                                                              |                                                                                                                                                                                                |                                                      |                          |
|------|--------------------------------------------------------------------------------------------------------------------------------------------------------------|------------------------------------------------------------------------------------------------------------------------------------------------------------------------------------------------|------------------------------------------------------|--------------------------|
| 2016 | Kucukyilmaz E, Savas S, Akcay M, Bolukbasi B.                                                                                                                | Effect of silver diamine fluoride and ammonium hexafluorosilicate applications with and without Er:YAG laser irradiation on the microtensile bond strength in sound and caries-affected dentin | Lasers Surg Med                                      | Different type of study  |
| 2019 | Kumar A., Cernigliaro D., Northridge M.E., Wu Y., Troxel A.B., Cunha-Cruz J., Balzer J., Okuji D.M.                                                          | A survey of caregiver acculturation and acceptance of silver diamine fluoride treatment for childhood caries                                                                                   | BMC oral health                                      | Different outcome        |
| 1993 | Kupietzky, A.                                                                                                                                                | Teaching kindergarten and elementary school children dental health: a practical presentation.                                                                                                  | The Journal of clinical pediatric dentistry          | Serch noise              |
| 2020 | Kurkina, O.N., Osokina, A.S., Makedonova, Y.A., Afonina, I.V., Pyshnenko, V.R., Kurkina, V.M., Maslak, E.E.                                                  | Parents' compliance with silver diamine fluoride use for treatment of caries lesions in children                                                                                               | Journal of International Dental and Medical Research | Different outcome        |
| 2020 | Kyoon-Achan G., Schroth R.J., DeMarÃ© D., Sturym M., Edwards J., Lavoie J.G., Sanguins J., Campbell R., Chartrand F., Bertone M.F., Singh S., Moffatt M.E.K. | Indigenous community members' views on silver diamine fluoride to manage early childhood caries                                                                                                | Journal of public health dentistry                   | Different outcome        |
| 2021 | Kyoon-Achan G., Schroth R.J., Martin H., Bertone M., Mittermuller B.A., Sihra R., Klus B., Singh S., Moffatt M.E.K.                                          | Parents' Views on Silver Diamine Fluoride to Manage Early Childhood Caries                                                                                                                     | JDR clinical and translational research              | Different outcome        |
| 2021 | Lau L, Quock RL, Wu DI, Harrington DA, Patel SA, Barros JA.                                                                                                  | Effect of surface preparation and light curing on penetration of silver particles from 38% silver diamine fluoride in dentin of primary teeth: An in vitro evaluation                          | Am J Dent                                            | Wrong study design       |
| 2013 | Laupez, R.M., Uribe, M.R., Rodríguez, B.O., Casasempere, I.V.                                                                                                | Comparison between amine fluoride and chlorhexidine with institutionalized elders: A pilot study                                                                                               | Gerodontology                                        | Different type of sample |
| 2014 | Lenzi, T.L., Braga, M.M., Raggio, D.P.                                                                                                                       | Shortening the etching time for etch-and-rinse adhesives increases the bond stability to simulated caries-affected primary dentin                                                              | Journal of Adhesive Dentistry                        | Serch noise              |
| 2015 | Lenzi, T.L., Raggio, D.P., Soares, F.Z.M., Rocha, R.O.                                                                                                       | Bonding performance of a multimode adhesive to artificially-induced caries-affected primary dentin                                                                                             | Journal of Adhesive Dentistry                        | Serch noise              |
| 2015 | Lewis A, Wallace J, Deutsch A, King P.                                                                                                                       | Improving the oral health of frail and functionally dependent elderly                                                                                                                          | Aust Dent J                                          | Serch noise              |

|      |                                                                                              |                                                                                                                                      |                              |                         |
|------|----------------------------------------------------------------------------------------------|--------------------------------------------------------------------------------------------------------------------------------------|------------------------------|-------------------------|
| 2016 | Li R, Lo EC, Liu BY, Wong MC, Chu CH.                                                        | Randomized clinical trial on arresting dental root caries through silver diammine fluoride applications in community-dwelling elders | J Dent                       | Different outcome       |
| 2017 | Li R, Lo ECM, Liu BY, Wong MCM, Chu CH.                                                      | Randomized Clinical Trial on Preventing Root Caries among Community-Dwelling Elders                                                  | JDR Clin Trans Res           | Different outcome       |
| 2019 | Li Y, Liu Y, Psoter WJ, Nguyen OM, Bromage TG, Walters MA, Hu B, Rabieh S, Kumararaja FC.    | Assessment of the Silver Penetration and Distribution in Carious Lesions of Deciduous Teeth Treated with Silver Diamine Fluoride     | Caries Res                   | Different outcome       |
| 1984 | Li YJ.                                                                                       | Effect of a silver ammonia fluoride solution on the prevention and inhibition of caries                                              | Zhonghua Kou Qiang Ke Za Zhi | Serch noise             |
| 2014 | Li, D., Fu, L., Zhang, Y., Yu, Q., Ma, F., Wang, Z., Luo, Z., Zhou, Z., Cooper, P.R., He, W. | The effects of LPS on adhesion and migration of human dental pulp stem cells in vitro                                                | Journal of Dentistry         | Serch noise             |
| 2002 | Li, H., Burrow, M.F., Tyas, M.J.                                                             | The effect of load cycling on the nanoleakage of dentin bonding systems                                                              | Dental Materials             | Serch noise             |
| 2002 | Li, H., Burrow, M.F., Tyas, M.J.                                                             | The effect of thermocycling regimens on the nanoleakage of dentin bonding systems                                                    | Dental Materials             | Serch noise             |
| 2021 | Lim, G.X.D., Yang, J.                                                                        | Effect of silver diamine fluoride on hyperplastic gingivitis in an adult with intellectual disability – A case report                | Special Care in Dentistry    | Different outcome       |
| 2019 | Lin YS, Rothen ML, Milgrom P.                                                                | Pharmacokinetics of 38% topical silver diamine fluoride in healthy adult volunteers                                                  | J Am Dent Assoc              | Different outcome       |
| 2020 | Liu B.Y., Liu J., Zhang D., Yang Z.L., Feng Y.P., Wang M.                                    | Effect of silver diammine fluoride on micro-ecology of plaque from extensive caries of deciduous teeth - in vitro study              | BMC oral health              | Different type of study |
| 2012 | Liu B.Y., Lo E.C.M., Chu C.H., Lin H.C.                                                      | Randomized trial on fluorides and sealants for fissure caries prevention                                                             | Journal of Dental Research   | Different outcome       |

|      |                                                                                                                |                                                                                                                                                                 |                                               |                         |
|------|----------------------------------------------------------------------------------------------------------------|-----------------------------------------------------------------------------------------------------------------------------------------------------------------|-----------------------------------------------|-------------------------|
| 2019 | Liu BY, Mei L, Chu CH, Lo ECM.                                                                                 | Effect of Silver Fluoride in Preventing the Formation of Artificial Dental Caries Lesions in vitro                                                              | Chin J Dent Res                               | Different type of study |
| 2001 | Lo EC, Chu CH, Lin HC.                                                                                         | A community-based caries control program for pre-school children using topical fluorides: 18-month results                                                      | J Dent Res                                    | Different outcome       |
| 2013 | Lopes Coutinho, T.C., Almeida Tostes, M.                                                                       | Comparison of microleakage of different margin types around Class V resin restorations in primary teeth                                                         | European Journal of Paediatric Dentistry      | Serch noise             |
| 2018 | Lou Y, Darvell BW, Botelho MG.                                                                                 | Antibacterial Effect of Silver Diammine Fluoride on Cariogenic Organisms                                                                                        | J Contemp Dent Pract                          | Different outcome       |
| 2011 | Lou, Y.L., Botelho, M.G., Darvell, B.W.                                                                        | Reaction of silver diamine fluoride with hydroxyapatite and protein                                                                                             | Journal of Dentistry                          | Different type of study |
| 2020 | Luk K, Zhao IS, Yu OY, Mei ML, Gutknecht N, Chu CH.                                                            | Caries Prevention Effects of Silver Diamine Fluoride with 10,600 nm Carbon Dioxide Laser Irradiation on Dentin                                                  | Photobiomodul Photomed Laser Surg             | Different outcome       |
| 2017 | Magalhaes AC.                                                                                                  | Conventional Preventive Therapies (Fluoride) on Root Caries Lesions                                                                                             | Monogr Oral Sci                               | Different outcome       |
| 2019 | Magno MB, Silva LPD, Ferreira DM, Barja-Fidalgo F, Fonseca-Gonçalves A.                                        | Aesthetic perception, acceptability and satisfaction in the treatment of caries lesions with silver diamine fluoride: A scoping review                          | Int J Paediatr Dent                           | Different type of study |
| 2020 | Markham MD, Tsujimoto A, Barkmeier WW, Jurado CA, Fischer NG, Watanabe H, Baruth AG, Latta MA, Garcia-Godoy F. | Influence of 38% silver diamine fluoride application on bond stability to enamel and dentin using universal adhesives in self-etch mode                         | Eur J Oral Sci                                | Different outcome       |
| 1997 | Martin AP.                                                                                                     | Silver fluoride use                                                                                                                                             | Aust Dent J                                   | Different type of study |
| 2015 | Mattos-Silveira J., Floriano I., Ferreira F.R., Vigana M.E., Mendes F.M., Braga M.M.                           | Children's discomfort may vary among different treatments for initial approximal caries lesions: preliminary findings of a randomized controlled clinical trial | International journal of paediatric dentistry | Different outcome       |

|      |                                                                                                                                                                         |                                                                                                                                                |                               |                          |
|------|-------------------------------------------------------------------------------------------------------------------------------------------------------------------------|------------------------------------------------------------------------------------------------------------------------------------------------|-------------------------------|--------------------------|
| 2014 | Mattos-Silveira J., Floriano I., Ferreira F.R., Vigana M.E.F., Frizzo M.A., Reyes A., Novaes T.F., Moriyama C.M., Raggio D.P., Imparato J.C.P., Mendes F.M., Braga M.M. | New proposal of silver diamine fluoride use in arresting approximal caries: Study protocol for a randomized controlled trial                   | Trials                        | Different type of sample |
| 2020 | McComas MJ, Hurlbutt M, Fontana M.                                                                                                                                      | A survey of cariology education in U.S. dental hygiene programs: The need for a core curriculum framework                                      | J Dent Educ                   | Serch noise              |
| 2018 | McReynolds D, Duane B.                                                                                                                                                  | Systematic review finds that silver diamine fluoride is effective for both root caries prevention and arrest in older adults                   | Evid Based Dent               | Different type of study  |
| 2014 | Mei M.L., Ito L., Cao Y., Lo E.C., Li Q.L., Chu C.H.                                                                                                                    | An ex vivo study of arrested primary teeth caries with silver diamine fluoride therapy                                                         | Journal of dentistry          | Different type of study  |
| 2020 | Mei M.L., Yan Z., Duangthip D., Niu J.Y., Yu O.Y., You M., Lo E.C.M., Chu C.H.                                                                                          | Effect of silver diamine fluoride on plaque microbiome in children                                                                             | Journal of dentistry          | Different outcome        |
| 2013 | Mei ML, Chu CH, Low KH, Che CM, Lo EC.                                                                                                                                  | Caries arresting effect of silver diamine fluoride on dentine carious lesion with S. mutans and L. acidophilus dual-species cariogenic biofilm | Med Oral Patol Oral Cir Bucal | Different outcome        |
| 2014 | Mei ML, Ito L, Chu CH, Lo EC, Zhang CF.                                                                                                                                 | Prevention of dentine caries using silver diamine fluoride application followed by Er:YAG laser irradiation: an in vitro study                 | Lasers Med Sci                | Different type of study  |
| 2015 | Mei ML, Ito L, Zhang CF, Lo EC, Chu CH.                                                                                                                                 | Effect of laser irradiation on the fluoride uptake of silver diamine fluoride treated dentine                                                  | Lasers Med Sci                | Different outcome        |
| 2013 | Mei ML, Li QL, Chu CH, Lo EC, Samaranayake LP.                                                                                                                          | Antibacterial effects of silver diamine fluoride on multi-species cariogenic biofilm on caries                                                 | Ann Clin Microbiol Antimicrob | Wrong study design       |
| 2016 | Mei ML, Lo EC, Chu CH.                                                                                                                                                  | Clinical Use of Silver Diamine Fluoride in Dental Treatment                                                                                    | Compend Contin Educ Dent      | Different type of study  |
| 2018 | Mei ML, Lo ECM, Chu CH.                                                                                                                                                 | Arresting Dentine Caries with Silver Diamine Fluoride: What's Behind It?                                                                       | J Dent Res                    | Different type of study  |

|      |                                                                    |                                                                                                                                                                                                      |                                               |                         |
|------|--------------------------------------------------------------------|------------------------------------------------------------------------------------------------------------------------------------------------------------------------------------------------------|-----------------------------------------------|-------------------------|
| 2017 | Mei ML, Nudelman F, Marzec B, Walker JM, Lo ECM, Walls AW, Chu CH. | Formation of Fluorohydroxyapatite with Silver Diamine Fluoride                                                                                                                                       | J Dent Res                                    | Different outcome       |
| 2016 | Mei ML, Zhao IS, Ito L, Lo EC, Chu CH.                             | Prevention of secondary caries by silver diamine fluoride                                                                                                                                            | Int Dent J                                    | Different outcome       |
| 2013 | Mei, M.L., Chu, C.H., Lo, E.C.M., Samaranayake, L.P.               | Fluoride and silver concentrations of silver diammine fluoride solutions for dental use                                                                                                              | International Journal of Paediatric Dentistry | Different outcome       |
| 2014 | Mei, M.L., Ito, L., Cao, Y., Li, Q.L., Chu, C.H., Lo, E.C.M.       | The inhibitory effects of silver diamine fluorides on cysteine cathepsins                                                                                                                            | Journal of Dentistry                          | Different outcome       |
| 2012 | Mei, M.L., Li, Q.L., Chu, C.H., Yiu, C.K.Y., Lo, E.C.M.            | The inhibitory effects of silver diamine fluoride at different concentrations on matrix metalloproteinases                                                                                           | Dental Materials                              | Different outcome       |
| 2021 | Mendiratta M, B C M, Kumar A, Yadav V, Shyam R, Wig M.             | Effectiveness of silver diamine fluoride and glass ionomer cement combined with fluoride varnish in arresting dental caries among intellectually disabled individuals: A randomized controlled trial | Spec Care Dentist                             | Different outcome       |
| 2019 | Meyer-Lueckel H, Machiulskiene V, Giacaman RA.                     | How to Intervene in the Root Caries Process? Systematic Review and Meta-Analyses                                                                                                                     | Caries Res                                    | Different type of study |
| 2009 | Milgrom P, Zero DT, Tanzer JM.                                     | An examination of the advances in science and technology of prevention of tooth decay in young children since the Surgeon General's Report on Oral Health                                            | Acad Pediatr                                  | Different outcome       |
| 2011 | Milgrom P., Chi D.L.                                               | Prevention-centered caries management strategies during critical periods in early childhood.                                                                                                         | Journal of the California Dental Association  | Different outcome       |
| 2019 | Miller DB.                                                         | A new protocol and standard of care for managing open crown margins                                                                                                                                  | Gen Dent                                      | Different type of study |
| 2016 | Miller MB, Laupez LA, Quock RL.                                    | Silver diamine fluoride, potassium iodide, and esthetic perception: An in vitro pilot study                                                                                                          | Am J Dent                                     | Wrong study design      |

|      |                                                                                                                 |                                                                                                                                                               |                                                    |                                     |
|------|-----------------------------------------------------------------------------------------------------------------|---------------------------------------------------------------------------------------------------------------------------------------------------------------|----------------------------------------------------|-------------------------------------|
| 2021 | Minavi B, Youssefi A, Quock R, Letra A, Silva R, Kirkpatrick TC, Tribble G, van der Hoeven R.                   | Evaluating the substantivity of silver diamine fluoride in a dentin model                                                                                     | Clin Exp Dent Res                                  | Different outcome                   |
| 2020 | Mishra S., Mohanty S.                                                                                           | Silver diamine fluoride in clinical pediatric dentistry                                                                                                       | Indian Journal of Forensic Medicine and Toxicology | Different type of study             |
| 2021 | Mitchell C, Gross AJ, Milgrom P, Mancl L, Prince DB.                                                            | Silver diamine fluoride treatment of active root caries lesions in older adults: A case series                                                                | J Dent                                             | Different outcome                   |
| 2021 | Mitchell C, Zaku H, Milgrom P, Mancl L, Prince DB.                                                              | The accuracy of laser fluorescence (DIAGNOdent) in assessing caries lesion activity on root surfaces, around crown margins, and in furcations in older adults | BDJ Open                                           | Serch noise                         |
| 2019 | Mitwalli H, Mourao MDA, Dennison J, Yaman P, Paster BJ, Fontana M.                                              | Effect of Silver Diamine Fluoride Treatment on Microbial Profiles of Plaque Biofilms from Root/Cervical Caries Lesions                                        | Caries Res                                         | Different outcome                   |
| 2018 | Mohammadi N, Farahmand Far MH.                                                                                  | Effect of fluoridated varnish and silver diamine fluoride on enamel demineralization resistance in primary dentition                                          | J Indian Soc Pedod Prev Dent                       | Different outcome                   |
| 2012 | Monse B, Heinrich-Weltzien R, Mulder J, Holmgren C, van Palenstein Helderma WH.                                 | Caries preventive efficacy of silver diamine fluoride (SDF) and ART sealants in a school-based daily fluoride toothbrushing program in the Philippines        | BMC Oral Health                                    | Different outcome                   |
| 2021 | Moradi S., Sabbagh S., Timms L., Ravaghi V.                                                                     | Teaching Minimally Invasive Interventions in Paediatric Dentistry: A Cross-Sectional Survey of Dental Schools in Iran                                         | BMC oral health                                    | Different outcome                   |
| 2021 | Moreira, K.M., Bertassoni, L.E., Davies, R.P., Joia, F., Hofling, J.F., Nascimento, F.D., Puppini-Rontani, R.M. | Impact of biomineralization on resin/biomineralized dentin bond longevity in a minimally invasive approach: An <i>in vitro</i> 18-month follow-up             | Dental Materials                                   | Serch noise                         |
| 1974 | Moriwaki Y, Shimizu A, Nonomura E, Sobue S, Tsutsumi S.                                                         | X-ray microbeam diffraction studies on the effect of diamine silver fluoride                                                                                  | Shika Rikogaku Zasshi                              | Abstract or full-text not available |
| 1996 | Murata H, Ishikawa K, Tenshin S, Horiuchi S, Nakanishi M, Asaoka K, Kawata T, Yamamoto TT.                      | Fluoridation of hydroxyapatite powder by ammonium hexafluorosilicate                                                                                          | Caries Res                                         | Serch noise                         |

|      |                                                               |                                                                                                                                                                                   |                                 |                                     |
|------|---------------------------------------------------------------|-----------------------------------------------------------------------------------------------------------------------------------------------------------------------------------|---------------------------------|-------------------------------------|
| 1998 | Naasan, M.A., Watson, T.F.                                    | Conventional glass ionomers as posterior restorations: A status report for the American Journal of Dentistry                                                                      | American Journal of Dentistry   | Serch noise                         |
| 2021 | Nainar S.M.H.                                                 | Silver Diamine Fluoride Usage in Children                                                                                                                                         | Pediatric dentistry             | Abstract or full-text not available |
| 2016 | Nantanee R, Santiwong B, Trairatvorakul C, Hamba H, Tagami J. | Silver diamine fluoride and glass ionomer differentially remineralize early caries lesions, in situ                                                                               | Clin Oral Investig              | Different outcome                   |
| 2012 | Neelakantan, P., Rao, C.V.S., Indramohan, J.                  | Bacteriology of deep carious lesions underneath amalgam restorations with different pulp-capping materials - An in vivo analysis                                                  | Journal of Applied Oral Science | Serch noise                         |
| 2020 | Nelson S, Albert JM, Milgrom P.                               | Comparative Effectiveness of Two Nonsurgical Treatments to Reduce Oral Health Disparities From Untreated Tooth Decay in Older Adults: Protocol for a Cluster Randomized Trial     | JMIR Res Protoc                 | Different type of sample            |
| 2016 | Nelson T., Scott J.M., Crystal Y.O., Berg J.H., Milgrom P.    | Silver Diamine Fluoride in Pediatric Dentistry Training Programs: Survey of Graduate Program Directors                                                                            | Pediatric dentistry             | Different outcome                   |
| 2020 | Ng E, Saini S, Schulze KA, Horst J, Le T, Habelitz S.         | Shear Bond Strength of Glass Ionomer Cement to Silver Diamine Fluoride-Treated Artificial Dentinal Caries                                                                         | Pediatr Dent                    | Different type of study             |
| 2018 | Ngoc CN, Mehta R, Donovan TE, Ferreira Zandona AG.            | Teaching Silver Diamine Fluoride in U.S. Dental Schools' Predoctoral Curricula                                                                                                    | J Dent Educ                     | Different outcome                   |
| 1981 | Nielsen A., Ravn J.J.                                         | Treatment with silver nitrate in pedodontics                                                                                                                                      | Tandlaegebladet                 | Abstract or full-text not available |
| 1977 | Nishino M, Massler M.                                         | Immunization of caries-susceptible pits and fissures with a diammine silver fluoride solution                                                                                     | The Journal of pedodontics      | Abstract or full-text not available |
| 1974 | Nishino M, Ono S, Kita Y, Tsuchitani Y.                       | Caries prevention in pits and fissures with diammine silver fluoride solution and fissure sealant. Sealing properties of pits and fissures and adhesive characteristics to enamel | J Osaka Univ Dent Sch           | Different outcome                   |

|      |                                                                                                      |                                                                                                                                             |                              |                                     |
|------|------------------------------------------------------------------------------------------------------|---------------------------------------------------------------------------------------------------------------------------------------------|------------------------------|-------------------------------------|
| 1969 | Nishino M, Yoshida S, Sobue S, Kato J, Nishida M.                                                    | Effect of topically applied ammoniacal silver fluoride on dental caries in children                                                         | J Osaka Univ Dent Sch        | Abstract or full-text not available |
| 1969 | Nishino M.                                                                                           | Studies on the topical application of ammoniacal silver fluoride for the arrest of dental caries                                            | Osaka Daigaku Shigaku Zasshi | Abstract or full-text not available |
| 2020 | Nizami MZI, Nishina Y, Yamamoto T, Shinoda-Ito Y, Takashiba S.                                       | Functionalized Graphene Oxide Shields Tooth Dentin from Decalcification                                                                     | J Dent Res                   | Serch noise                         |
| 2017 | No authors listed                                                                                    | Chairside Guide: Silver Diamine Fluoride in the Management of Dental Caries Lesions                                                         | Pediatric dentistry          | Different type of study             |
| 2017 | No authors listed                                                                                    | Limited evidence suggesting silver diamine fluoride may arrest dental caries in children                                                    | British dental journal       | Different type of study             |
| 2017 | Nozari A, Ajami S, Rafiei A, Niazi E.                                                                | Impact of Nano Hydroxyapatite, Nano Silver Fluoride and Sodium Fluoride Varnish on Primary Teeth Enamel Remineralization: An In Vitro Study | J Clin Diagn Res             | Serch noise                         |
| 2020 | Nurrohman H, Habelitz S, Saeki K, Sadr A, Gower LB, Pazdernik V, Tagami J, Marshall SJ, Marshall GW. | Enhanced silver diamine fluoride therapy using the PILP method -A nanoindentation study                                                     | Dent Mater J                 | Different outcome                   |
| 1989 | Nystrom, G.P., Holtan, J.R., Olin, P.S., Douglas, W.H.                                               | Technical note: Fluoride pre-treatment effects on microleakage of a resin bonding agent                                                     | Dental Materials             | Serch noise                         |
| 1974 | Okuyama T.                                                                                           | On the penetration of diammine silver fluoride into the carious dentin of deciduous teeth (author's transl)                                 | Shigaku                      | Different outcome                   |
| 2019 | Oliveira B.H., Rajendra A., Veitz-Keenan A., Niederman R.                                            | The Effect of Silver Diamine Fluoride in Preventing Caries in the Primary Dentition: A Systematic Review and Meta-Analysis                  | Caries research              | Different type of study             |
| 2018 | Oliveira BH, Cunha-Cruz J, Rajendra A, Niederman R.                                                  | Controlling caries in exposed root surfaces with silver diamine fluoride: A systematic review with meta-analysis                            | J Am Dent Assoc              | Different outcome                   |



|      |                                                                                                                                            |                                                                                                                             |                                                                                                         |                         |
|------|--------------------------------------------------------------------------------------------------------------------------------------------|-----------------------------------------------------------------------------------------------------------------------------|---------------------------------------------------------------------------------------------------------|-------------------------|
| 2018 | PÃ©rez-HernÃ¡ndez, J., Aguilar-DÃ¡az, F.C., Venegas-LancÃ³n, R.D., Gayosso, C.A.Ã., Villanueva-Vilchis, M.C., de la Fuente-HernÃ¡ndez, J. | Effect of silver diamine fluoride on adhesion and microleakage of a pit and fissure sealant to tooth enamel: in vitro trial | European Archives of Paediatric Dentistry                                                               | Different type of study |
| 2016 | Paglia L.                                                                                                                                  | Pit and fissure sealants or fluoride varnishes?                                                                             | European journal of paediatric dentistry : official journal of European Academy of Paediatric Dentistry | Serch noise             |
| 2018 | Pakdaman A, Montazeri A, Evans RW.                                                                                                         | Deciduous dentition approximal caries lesion progression and regression following preventive treatment: literature review   | Aust Dent J                                                                                             | Different type of study |
| 2021 | Panahpour Eslami N, Chan DCN, Sadr A.                                                                                                      | Effect of silver diamine fluoride and glass ionomer on remineralisation of natural dentine caries                           | J Dent                                                                                                  | Different type of study |
| 2018 | Patel J, Anthonappa RP, King NM.                                                                                                           | Evaluation of the staining potential of silver diamine fluoride: in vitro                                                   | Int J Paediatr Dent                                                                                     | Different type of study |
| 2021 | Patel J, Foster D, Smirk M, Turton B, Anthonappa R.                                                                                        | Acidity, fluoride and silver ion concentrations in silver diamine fluoride solutions: a pilot study                         | Aust Dent J                                                                                             | Different outcome       |
| 2021 | Paul B, Sierra MA, Xu F, Crystal YO, Li X, Saxena D, Ruff RR.                                                                              | Microbial population shift and metabolic characterization of silver diamine fluoride treatment failure on dental caries     | PLoS One                                                                                                | Different outcome       |
| 2018 | Pedram, P., Hooshmand, T., Heidari, S.                                                                                                     | Effect of different cavity lining techniques on marginal sealing of class II resin composite restorations in vitro          | International Journal of Periodontics and Restorative Dentistry                                         | Different type of study |
| 2012 | Peng JJ, Botelho MG, Matinlinna JP.                                                                                                        | Silver compounds used in dentistry for caries management: a review                                                          | J Dent                                                                                                  | Different type of study |
| 2019 | Peng JY, Tsoi JKH, Matinlinna JP, Botelho MG.                                                                                              | Silver deposition on demineralized dentine surface dosed by silver diamine fluoride with different saliva                   | J Investig Clin Dent                                                                                    | Different outcome       |

|      |                                                                                                                       |                                                                                                                          |                                                            |                         |
|------|-----------------------------------------------------------------------------------------------------------------------|--------------------------------------------------------------------------------------------------------------------------|------------------------------------------------------------|-------------------------|
| 2003 | Peris, A.R., Duarte Jr., S., De Andrade, M.F.                                                                         | Evaluation of marginal microleakage in Class II cavities: Effect of microhybrid, flowable, and compactable resins        | Quintessence International                                 | Serch noise             |
| 2011 | Pimentel, A.C., dos Santos, M.P.A., Maia, L.C., Dias, K.R.H.C.                                                        | Effect of enamel bevel on microleakage in class I cavities in primary molars                                             | Pesquisa Brasileira em Odontopediatria e Clínica Integrada | Serch noise             |
| 2021 | Piovesan ET, Silva MV, de Campos TA, Martins VD, Bezzerra ACB.                                                        | Antimicrobial effects of silver diamine fluoride: An in vivo study                                                       | Am J Dent                                                  | Different type of study |
| 2021 | Piovesan ET., Silva M.V., de Campos T.A., Martins V.D., Bezzerra A.C.B.                                               | Effectiveness of two desensitizing products: A 6-month randomized clinical, split-mouth study                            | American journal of dentistry                              | Different outcome       |
| 2020 | Pisarnturakit P., Detsomboonrat P.                                                                                    | Comparison of two caries prevention programs among Thai kindergarten: a randomized controlled trial                      | BMC oral health                                            | Different outcome       |
| 2021 | Punhagui MF, Jussiani EI, Andrello AC, Favaro JC, Guiraldo RD, Lopes MB, Berger SB.                                   | Effect of application time and concentration of silver diamine fluoride on the enamel remineralization                   | J Clin Exp Dent                                            | Different type of study |
| 2018 | Punyanirun K, Yospiboonwong T, Kunapinun T, Thanyasrisung P, Trairatvorakul C.                                        | Silver diamine fluoride remineralized artificial incipient caries in permanent teeth after bacterial pH-cycling in-vitro | J Dent                                                     | Different outcome       |
| 2018 | Puwanawiroj A, Trairatvorakul C, Dasanayake AP, Auychai P.                                                            | Microtensile Bond Strength Between Glass Ionomer Cement and Silver Diamine Fluoride-Treated Carious Primary Dentin       | Pediatr Dent                                               | Different type of study |
| 2011 | Quock RL, Patel SA, Falcao FA, Barros JA.                                                                             | Is a drill-less dental filling possible?                                                                                 | Med Hypotheses                                             | Serch noise             |
| 2012 | Quock, R.L., Barros, J.A., Yang, S.W., Patel, S.A.                                                                    | Effect of silver diamine fluoride on microtensile bond strength to dentin                                                | Operative Dentistry                                        | Different outcome       |
| 2017 | Rajendra A., Veitz-Keenan A., Oliveira B.H., Ruff R.R., Wong M.C.M., Innes N.P.T., Radford J., Seifo N., Niederman R. | Topical silver diamine fluoride for managing dental caries in children and adults                                        | Cochrane Database of Systematic Reviews                    | different type of study |

|      |                                                                                                  |                                                                                                                                           |                                                   |                         |
|------|--------------------------------------------------------------------------------------------------|-------------------------------------------------------------------------------------------------------------------------------------------|---------------------------------------------------|-------------------------|
| 2020 | Rams TE, Sautter JD, Ram  rez-Mart  nez GJ, Whitaker EJ.                                         | Antimicrobial activity of silver diamine fluoride on human periodontitis microbiota                                                       | Gen Dent                                          | Different outcome       |
| 2012 | Reis A., Chibinski A.C., Stanislawczuk R., Wambier D.S., Grande R.H., Loguercio A.D.             | The role of dentin moisture in the degradation of resin-dentin interfaces under clinical and laboratory conditions.                       | Journal of the American Dental Association (1939) | Serch noise             |
| 2021 | Renugalakshmi A., Vinothkumar T.S., Hakami F.B., Salem R.M., Qadri A.A., Harbosh Z.M., Hakami Z. | Impact of Silver Diamine Fluoride Therapy on Oral Health-related Quality of Life of Uncooperative Preschool Children: A Prospective Study | Oral health & preventive dentistry                | Different outcome       |
| 2017 | Richards D.                                                                                      | The effectiveness of silver diamine fluoride in arresting caries                                                                          | Evid Based Dent                                   | Different type of study |
| 2020 | Rizzante, F.A.P., Sedky, R.A.F., Furuse, A.Y., Teich, S., Ishikiriyama, S.K., Mendon  a, G.      | Validation of a method of quantifying 3D leakage in dental restorations                                                                   | Journal of Prosthetic Dentistry                   | Serch noise             |
| 2020 | Roberts A, Bradley J, Merkley S, Pachal T, Gopal JV, Sharma D.                                   | Does potassium iodide application following silver diamine fluoride reduce staining of tooth? A systematic review                         | Aust Dent J                                       | Different type of study |
| 2019 | Roberts-Thomson K.F., Ha D.H., Wooley S., Meihubers S., Do L.G.                                  | Community trial of silver fluoride treatment for deciduous dentition caries in remote Indigenous communities                              | Australian dental journal                         | Search noise            |
| 2020 | Rodrigues GF, Costa TDC, Massa GDS, Vollu AL, Barja-Fidalgo F, Fonseca-Goncalves A.              | Oral Health-Related Quality of Life in Preschool Children After Silver Diamine Fluoride Versus Atraumatic Restorative Treatments          | Pediatr Dent                                      | Different outcome       |
| 2020 | Romero DA, Fern  ndez CE, de Melo Santos L.                                                      | Commercial Silver Diamine Fluoride (SDF) Products on Caries Lesion Progression in Primary Enamel: An In Vitro Study                       | Oral Health Prev Dent                             | Different type of study |
| 2021 | Romero MJRH, Lippert F.                                                                          | Indirect caries-preventive effect of silver diamine fluoride on adjacent dental substrate: A single-section demineralization study        | Eur J Oral Sci                                    | Different type of study |
| 2009 | Rosenblatt A, Stamford TC, Niederman R.                                                          | Silver diamine fluoride: a caries "silver-fluoride bullet"                                                                                | J Dent Res                                        | Different type of study |

|      |                                                                                                                       |                                                                                                                                                                                              |                                                          |                         |
|------|-----------------------------------------------------------------------------------------------------------------------|----------------------------------------------------------------------------------------------------------------------------------------------------------------------------------------------|----------------------------------------------------------|-------------------------|
| 2020 | Roshni R.S., Shetty P.J.                                                                                              | Nano silver fluoride for arresting dental caries                                                                                                                                             | Journal of Pharmaceutical Sciences and Research          | Serch noise             |
| 2017 | Rossi G, Squassi A, Mandalunis P, Kaplan A.                                                                           | Effect of silver diamine fluoride (SDF) on the dentin-pulp complex: ex vivo histological analysis on human primary teeth and rat molars                                                      | Acta Odontol Latinoam                                    | Different type of study |
| 1991 | Roth, S.                                                                                                              | A laboratory study of glass ionomer cement as a retrograde root filling material                                                                                                             | Australian Dental Journal                                | Different type of study |
| 2019 | Rubin M.S., Nunez N., Quick J.D., Edelstein B.L.                                                                      | A survey of US early childhood caries programs: findings and recommendations                                                                                                                 | Journal of public health dentistry                       | Different type of study |
| 2019 | Rudiak, A., Opydo-Szymaczek, J., Opydo, W.                                                                            | Fluoride content in drinking water from shallow dug wells in the agricultural area of subcarpathian province (Poland)                                                                        | Fluoride                                                 | Serch noise             |
| 2018 | Ruff R.R., Niederman R.                                                                                               | Comparative effectiveness of treatments to prevent dental caries given to rural children in school-based settings: Protocol for a cluster randomised controlled trial                        | BMJ Open                                                 | Different type of study |
| 2018 | Ruff RR, Niederman R.                                                                                                 | Silver diamine fluoride versus therapeutic sealants for the arrest and prevention of dental caries in low-income minority children: study protocol for a cluster randomized controlled trial | Trials                                                   | Different type of study |
| 1987 | Russo M., Komatsu J., Takayama S., Holland JÃºnior C., Sundfeld R.H., Mestreneur S.R., de Castro M.A., Quintella L.P. | Silver diamine fluoride. Pulp response to application of a 10% solution to dentin                                                                                                            | RGO                                                      | Different outcome       |
| 2020 | Sabbagh H., Othman M., Khogeer L., Al-Harbi H., Al Harthi A., Abdulgader Yaseen Abdulgader A.                         | Parental acceptance of silver Diamine fluoride application on primary dentition: a systematic review and meta-analysis                                                                       | BMC oral health                                          | Different outcome       |
| 2021 | Salamoon M.A., Waly N.G., Elmasry E.S., Abdelgawad F.                                                                 | Effect of discoloration of silver diamine fluoride versus sodium fluoride varnish in treatment of carious primary teeth: A randomized clinical trial                                         | Indian Journal of Public Health Research and Development | Different outcome       |
| 2020 | Sanjari, K., Bayani, M., Zadeh, H.E.                                                                                  | Conservative dental management of a patient with Epidermolysis bullosa. A case report                                                                                                        | Pediatric Dental Journal                                 | Different type of study |

|      |                                                                                                        |                                                                                                                                                                        |                                                      |                         |
|------|--------------------------------------------------------------------------------------------------------|------------------------------------------------------------------------------------------------------------------------------------------------------------------------|------------------------------------------------------|-------------------------|
| 2009 | Santos Lde M, Reis JI, Medeiros MP, Ramos SM, Araújo JM.                                               | In vitro evaluation of fluoride products in the development of carious lesions in deciduous teeth                                                                      | Braz Oral Res                                        | Different type of study |
| 2014 | Santos V.E., Vasconcelos Filho A., Targino A.G., Flores M.A., Galembeck A., Caldas A.F., Rosenblatt A. | A new "silver-bullet" to treat caries in children--nano silver fluoride: a randomised clinical trial                                                                   | Journal of dentistry                                 | Serch noise             |
| 1989 | Sato M, Ozawa Y, Masaya M, Uchikawa Y, Tosaka S, Okumura T.                                            | Clinical evaluation of the GaALAs laser treatment for hypersensitive dentin                                                                                            | Shigaku                                              | Serch noise             |
| 2017 | Satyanegara, A., Darwita, R.R., Setiawati, F., Adiatman, M., Muhammad, R.                              | An invitro study of caries arresting effect of propolis fluoride and silver diamine fluoride on dentine carious lesions                                                | Journal of International Dental and Medical Research | Different type of study |
| 2015 | Savas S, Kucukyılmaz E, Celik EU, Ates M.                                                              | Effects of different antibacterial agents on enamel in a biofilm caries model                                                                                          | J Oral Sci                                           | Different type of study |
| 2016 | Savas S, Kucukyilmaz E, Celik EU.                                                                      | Effects of Remineralization Agents on Artificial Carious Lesions                                                                                                       | Pediatr Dent                                         | Different type of study |
| 2020 | Sayed M, Hiraishi N, Matin K, Abdou A, Burrow MF, Tagami J.                                            | Effect of silver-containing agents on the ultra-structural morphology of dentinal collagen                                                                             | Dent Mater                                           | Serch noise             |
| 2021 | Sayed M, Nikaido T, Abdou A, Burrow MF, Tagami J.                                                      | Potential use of silver diammine fluoride in detection of carious dentin                                                                                               | Dent Mater J                                         | Different type of study |
| 2020 | Schmoeckel J, Gorseta K, Splieth CH, Juric H.                                                          | How to Intervene in the Caries Process: Early Childhood Caries - A Systematic Review                                                                                   | Caries Res                                           | Different type of study |
| 2018 | Schwass DR, Lyons KM, Love R, Tompkins GR, Meledandri CJ.                                              | Antimicrobial Activity of a Colloidal AgNP Suspension Demonstrated In Vitro against Monoculture Biofilms: Toward a Novel Tooth Disinfectant for Treating Dental Caries | Adv Dent Res                                         | Serch noise             |
| 2017 | Schwendicke F, Goestemeyer G.                                                                          | Cost-effectiveness of root caries preventive treatments                                                                                                                | J Dent                                               | Different outcome       |

|      |                                                                                            |                                                                                                                                                                                                                                                          |                            |                         |
|------|--------------------------------------------------------------------------------------------|----------------------------------------------------------------------------------------------------------------------------------------------------------------------------------------------------------------------------------------------------------|----------------------------|-------------------------|
| 2014 | Schwendicke, F., Meyer-Lueckel, H., Schulz, M., Doerfer, C.E., Paris, S.                   | Radiopaque tagging masks caries lesions following incomplete excavation in vitro                                                                                                                                                                         | Journal of Dental Research | Different type of study |
| 2020 | Scully A.C., Yepes J.F., Tang Q., Downey T., Maupome G.                                    | Utilization of Silver Diamine Fluoride by Dentists in the United States: A Dental Claims Review                                                                                                                                                          | Pediatric dentistry        | Different type of study |
| 2018 | Seifo N, Al-Yaseen W, Innes N.                                                             | The efficacy of silver diamine fluoride in arresting caries in children                                                                                                                                                                                  | Evid Based Dent            | Different type of study |
| 2021 | Seifo N, Cassie H, Radford JR, Innes NPT.                                                  | "I guess it looks worse to me, it doesn't look like there's been a problem solved but obviously there is": a qualitative exploration of children's and their parents' views of silver diamine fluoride for the management of carious lesions in children | BMC Oral Health            | Different type of study |
| 2019 | Seifo N, Cassie H, Radford JR, Innes NPT.                                                  | Silver diamine fluoride for managing carious lesions: an umbrella review                                                                                                                                                                                 | BMC Oral Health            | Different type of study |
| 2020 | Seifo N., Cassie H., Radford J., Innes N.                                                  | "It's really no more difficult than putting on fluoride varnish": a qualitative exploration of dental professionals' views of silver diamine fluoride for the management of carious lesions in children                                                  | BMC oral health            | Different type of study |
| 2020 | Seifo N., Robertson M., MacLean J., Blain K., Grosse S., Milne R., Seeballuck C., Innes N. | The use of silver diamine fluoride (SDF) in dental practice                                                                                                                                                                                              | British dental journal     | Different type of study |
| 2011 | Sequeira-Byron P, Lussi A.                                                                 | Prevention of root caries                                                                                                                                                                                                                                | Evid Based Dent            | Serch noise             |
| 2020 | Seto J., Horst J.A., Parkinson D.Y., Frachella J.C., DeRisi J.L.                           | Enhanced Tooth Structure Via Silver Microwires Following Treatment with 38 Percent Silver Diamine Fluoride                                                                                                                                               | Pediatric dentistry        | Different type of study |
| 2015 | Sharma G, Puranik MP, K R S.                                                               | Approaches to Arresting Dental Caries: An Update                                                                                                                                                                                                         | J Clin Diagn Res           | Different type of study |
| 1994 | Shellis RP.                                                                                | Effects of a supersaturated pulpal fluid on the formation of caries-like lesions on the roots of human teeth                                                                                                                                             | Caries Res                 | Different outcome       |

|      |                                                                                                                                                                                                                              |                                                                                                                                                                      |                                                            |                          |
|------|------------------------------------------------------------------------------------------------------------------------------------------------------------------------------------------------------------------------------|----------------------------------------------------------------------------------------------------------------------------------------------------------------------|------------------------------------------------------------|--------------------------|
| 2012 | Shibata S, Suge T, Kimura T, Ishikawa K, Matsuo T.                                                                                                                                                                           | Antibacterial activity of ammonium hexafluorosilicate solution with antimicrobial agents for the prevention of dentin caries                                         | Am J Dent                                                  | Serch noise              |
| 2020 | Sihra R., Schroth R.J., Bertone M., Martin H., Patterson B., Mittermuller B.-A., Lee V., Moffatt M.E., Klus B., Fontana M., Robertson L.                                                                                     | The Effectiveness of Silver Diamine Fluoride and Fluoride Varnish in Arresting Caries in Young Children and Associated Oral Health-Related Quality of Life           | Journal (Canadian Dental Association)                      | Follow up < 12 mo.       |
| 2019 | Silva, A.V.C., Teixeira, J.A., de Melo JÃºnior, P.C., de Souza Lima, M.G., de Oliveira Mota, C.C.B., Lins, E.C.C.C., Pereira, J.R.D., Gomes, A.S.L., Targino, A.G.R., Rosenblatt, A.                                         | Remineralizing potential of nano-silver-fluoride for tooth enamel: An optical coherence tomography analysis                                                          | Pesquisa Brasileira em Odontopediatria e Clínica Integrada | Serch noise              |
| 2011 | Sinha N, Gupta A, Logani A, Shah N.                                                                                                                                                                                          | Remineralizing efficacy of silver diamine fluoride and glass ionomer type VII for their proposed use as indirect pulp capping materials - Part II (A clinical study) | J Conserv Dent                                             | Different type of sample |
| 2018 | Slayton R.L., Urquhart O., Araujo M.W.B., Fontana M., GuzmÃ¡n-Armstrong S., Nascimento M.M., NovÃ½ B.B., Tinanoff N., Weyant R.J., Wolff M.S., Young D.A., Zero D.T., Tampi M.P., Pilcher L., Banfield L., Carrasco-Labra A. | Evidence-based clinical practice guideline on nonrestorative treatments for carious lesions: A report from the American Dental Association                           | Journal of the American Dental Association (1939)          | Different type of study  |
| 1975 | Snawder, K.D., Gonzalez Jr., W.E.                                                                                                                                                                                            | Management of severely diseased primary anterior teeth.                                                                                                              | ASDC journal of dentistry for children                     | Serch noise              |
| 2020 | Soares-Yoshikawa, A.L., Cury, J.A., Tabchoury, C.P.M.                                                                                                                                                                        | Fluoride concentration in SDF commercial products and their bioavailability with demineralized dentine                                                               | Brazilian Dental Journal                                   | Different outcome        |
| 1963 | Sognnaes, R.F.                                                                                                                                                                                                               | The present status of caries research                                                                                                                                | The Journal of Prosthetic Dentistry                        | Different type of study  |
| 2021 | Sorkhdini P, Crystal YO, Tang Q, Lippert F.                                                                                                                                                                                  | In vitro rehardening and staining effects of silver diamine fluoride with and without mucin on early enamel caries lesions                                           | Am J Dent                                                  | Different type of study  |
| 2021 | Sorkhdini P, Crystal YO, Tang Q, Lippert F.                                                                                                                                                                                  | The effect of silver diamine fluoride in preventing in vitro primary coronal caries under pH-cycling conditions                                                      | Arch Oral Biol                                             | Different type of study  |

|      |                                                                                                                                                                                                                                                                                                                                    |                                                                                                                       |                                                                    |                                     |
|------|------------------------------------------------------------------------------------------------------------------------------------------------------------------------------------------------------------------------------------------------------------------------------------------------------------------------------------|-----------------------------------------------------------------------------------------------------------------------|--------------------------------------------------------------------|-------------------------------------|
| 2020 | Sorkhdini P, Gregory RL, Crystal YO, Tang Q, Lippert F.                                                                                                                                                                                                                                                                            | Effectiveness of in vitro primary coronal caries prevention with silver diamine fluoride - Chemical vs biofilm models | J Dent                                                             | Different type of study             |
| 2016 | Soxman J.A.                                                                                                                                                                                                                                                                                                                        | Noninvasive treatment for cavitated lesions in primary molars                                                         | General dentistry                                                  | Abstract or full-text not available |
| 2020 | Splieth C.H., Banerjee A., Bottenberg P., Breschi L., Campus G., Ekstrand K.R., Giacaman R.A., Haak R., Hannig M., Hickel R., Juric H., Lussi A., Machiulskiene V., Manton D.J., Jablonski-Momeni A., Opdam N.J.M., Paris S., Santamar a R.M., Schwendicke F., Tassery H., Ferreira Zandona A., Zero D.T., Zimmer S., Dom  jean S. | How to Intervene in the Caries Process in Children: A Joint ORCA and EFCD Expert Delphi Consensus Statement           | Caries research                                                    | Different type of study             |
| 2011 | Splieth, C.H., Berndt, C., Alkilzy, M., Treuner, A.                                                                                                                                                                                                                                                                                | Efficacy of semiannual topical fluoride application in schoolchildren                                                 | Quintessence International                                         | Serch noise                         |
| 2021 | Srisomboon S, Kettratad M, Pakawanit P, Rojviriya C, Phantumvanit P, Panpisut P.                                                                                                                                                                                                                                                   | Effects of Different Application Times of Silver Diamine Fluoride on Mineral Precipitation in Demineralized Dentin    | Dent J (Basel)                                                     | Different outcome                   |
| 2009 | Stanislawczuk, R., Amaral, R.C., Zander-Grande, C., Gagler, D., Reis, A., Loguercio, A.D.                                                                                                                                                                                                                                          | Chlorhexidine-containing acid conditioner preserves the longevity of resin-dentin bonds                               | Operative Dentistry                                                | Serch noise                         |
| 2011 | Stanislawczuk, R., Reis, A., Loguercio, A.D.                                                                                                                                                                                                                                                                                       | A 2-year in vitro evaluation of a chlorhexidine-containing acid on the durability of resin-dentin interfaces          | Journal of Dentistry                                               | Serch noise                         |
| 2018 | Sueyama, Y., Kaneko, T., Ito, T., Okiji, T.                                                                                                                                                                                                                                                                                        | Effect of lipopolysaccharide stimulation on stem cell-associated marker-expressing cells                              | International Endodontic Journal                                   | Serch noise                         |
| 2008 | Suge, T., Kawasaki, A., Ishikawa, K., Matsuo, T., Ebisu, S.                                                                                                                                                                                                                                                                        | Ammonium hexafluorosilicate elicits calcium phosphate precipitation and shows continuous dentin tubule occlusion      | Dental Materials                                                   | Serch noise                         |
| 2014 | Sugiyama, M., Hattori, H., Inoue, T., Wakita, H., Hibi, H., Ueda, M.                                                                                                                                                                                                                                                               | Stem cells from human exfoliated deciduous teeth enhance recovery from focal cerebral ischemia in rats                | Journal of Oral and Maxillofacial Surgery, Medicine, and Pathology | Serch noise                         |



|      |                                                                                                                                                                                                 |                                                                                                                                                                                |                                                     |                         |
|------|-------------------------------------------------------------------------------------------------------------------------------------------------------------------------------------------------|--------------------------------------------------------------------------------------------------------------------------------------------------------------------------------|-----------------------------------------------------|-------------------------|
| 2021 | Suguna, S., Jeevanandan, G., Rajeshkumar, S.                                                                                                                                                    | Cytotoxic effect of three different silver diamine fluoride: An in-vitro study                                                                                                 | International Journal of Dentistry and Oral Science | Different type of study |
| 2021 | Sulyanto RM, Kang M, Srirangapatanam S, Berger M, Candamo F, Wang Y, Dickson JR, Ng MW, Ho SP.                                                                                                  | Biom mineralization of Dental Tissues Treated with Silver Diamine Fluoride                                                                                                     | J Dent Res                                          | Different outcome       |
| 1989 | Swift, E.J.                                                                                                                                                                                     | In vitro Caries-inhibitory Properties of a Silver Cermet                                                                                                                       | Journal of Dental Research                          | Serch noise             |
| 1979 | SyryÅska, M.                                                                                                                                                                                    | Current views on the use of silver amalgams with added fluoride in the prevention of secondary caries                                                                          | Czasopismo stomatologiczne                          | Serch noise             |
| 2021 | Takahashi M, Matin K, Matsui N, Shimizu M, Tsuda Y, Uchinuma S, Hiraishi N, Nikaido T, Tagami J.                                                                                                | Effects of silver diamine fluoride preparations on biofilm formation of Streptococcus mutans                                                                                   | Dent Mater J                                        | Different outcome       |
| 1993 | Takahashi, K., Emilson, C.G., Birkhed, D.                                                                                                                                                       | Fluoride release in vitro from various glass ionomer cements and resin composites after exposure to NaF solutions                                                              | Dental Materials                                    | Serch noise             |
| 2010 | Tan HP, Lo EC, Dyson JE, Luo Y, Corbet EF.                                                                                                                                                      | A randomized trial on root caries prevention in elders                                                                                                                         | J Dent Res                                          | Serch noise             |
| 2014 | Targino AG, Flores MA, dos Santos Junior VE, de Godoy BenÃ© Bezerra F, de Luna Freire H, Galembeck A, Rosenblatt A.                                                                             | An innovative approach to treating dental decay in children. A new anti-caries agent                                                                                           | J Mater Sci Mater Med                               | Different outcome       |
| 2018 | Tedesco T.K., Gimenez T., Floriano I., Montagner A.F., Camargo L.B., Calvo A.F.B., Morimoto S., Raggio D.P.                                                                                     | Scientific evidence for the management of dentin caries lesions in pediatric dentistry: A systematic review and network meta-analysis                                          | PLoS ONE                                            | Different type of study |
| 2013 | Tegginmani, V.S., Goel, B., Uppin, V., Horatti, P., Vijay Kumar, L.S., Nainani, A.                                                                                                              | Comparison of antibacterial activity of glass-ionomer cement and amalgam in class two restorations by streptococcus mutans count analysis at fixed intervals: An in vivo study | Journal of Contemporary Dental Practice             | Serch noise             |
| 2018 | Teixeira, J.A., Costa E Silva, A.V., Dos Santos, V.E., De Melo, P.C., Arnaud, M., Lima, M.G., Flores, M.A.P., Stamford, T.C.M., Pereira, J.R.D., Targino, A.G.R., Galembeck, A., Rosenblatt, A. | Effects of a New Nano-Silver Fluoride-Containing Dentifrice on Demineralization of Enamel and Streptococcus mutans Adhesion and Acidogenicity                                  | International Journal of Dentistry                  | Serch noise             |

|      |                                                                                 |                                                                                                                                                                                                                                          |                                                   |                         |
|------|---------------------------------------------------------------------------------|------------------------------------------------------------------------------------------------------------------------------------------------------------------------------------------------------------------------------------------|---------------------------------------------------|-------------------------|
| 2016 | Thanatvarakorn, O., Islam, S., Nakashima, S., Sadr, A., Nikaido, T., Tagami, J. | Effects of zinc fluoride on inhibiting dentin demineralization and collagen degradation in vitro: A comparison of various topical fluoride agents                                                                                        | Dental Materials Journal                          | Different type of study |
| 1978 | Thibodeau, E.A., Handelman, S.L., Marquis, R.E.                                 | Inhibition and Killing of Oral Bacteria by Silver Ions Generated with Low Intensity Direct Current                                                                                                                                       | Journal of Dental Research                        | Serch noise             |
| 2020 | Thomas M.L., Magher K., Mugayar L., D'Ávila M., Tomar S.L.                      | Silver Diamine Fluoride Helps Prevent Emergency Visits in Children with Early Childhood Caries                                                                                                                                           | Pediatric dentistry                               | Different outcome       |
| 2021 | Thomas, C.S., Sharma, D.S., Sheet, D., Mukhopadhyay, A., Sharma, S.             | Cross-sectional visual comparison of remineralization efficacy of various agents on early smooth surface caries of primary teeth with swept source optical coherence tomography: Cross-sectional remineralization assessment with SS-OCT | Journal of Oral Biology and Craniofacial Research | Different type of study |
| 2020 | Timms L., Sumner O., Deery C., Rogers H.J.                                      | Everyone else is using it, so why isn't the UK? Silver diamine fluoride for children and young people                                                                                                                                    | Community dental health                           | Different type of study |
| 2020 | Timms, L., Deery, C., Stevens, C., Rodd, H.                                     | COVID-2019 Time to use silver diamine fluoride for Caries Arrest in general dental practice?                                                                                                                                             | Dental Update                                     | Different type of study |
| 1978 | Toolson, L.B., Smith, D.E.                                                      | A 2-year longitudinal study of overdenture patients. Part I: Incidence and control of caries on overdenture abutments                                                                                                                    | The Journal of Prosthetic Dentistry               | Serch noise             |
| 2021 | Toopchi S, Bakhurji E, Loo CY, Hassan M.                                        | Effect of Light Curing on Silver Diamine Fluoride in Primary Incisors: A Microscopic Ex Vivo Study                                                                                                                                       | Pediatr Dent                                      | Different type of study |
| 2021 | Torres PJ, Phan HT, Bojorquez AK, Garcia-Godoy F, Pinzon LM.                    | Minimally Invasive Techniques Used for Caries Management in Dentistry. A Review                                                                                                                                                          | J Clin Pediatr Dent                               | Different type of study |
| 2001 | Touyz, L.Z.G., Amsel, R.                                                        | Anticariogenic effects of black tea (Camellia sinensis) in caries prone-rats                                                                                                                                                             | Quintessence International                        | Different type of study |
| 2016 | Trask PA.                                                                       | Silver Diamine Fluoride: It's About Time!                                                                                                                                                                                                | J Calif Dent Assoc                                | Different type of study |

|      |                                                                                                                                                                                                                                                |                                                                                                                                                                           |                                                            |                         |
|------|------------------------------------------------------------------------------------------------------------------------------------------------------------------------------------------------------------------------------------------------|---------------------------------------------------------------------------------------------------------------------------------------------------------------------------|------------------------------------------------------------|-------------------------|
| 2009 | Triches, T.C., Cordeiro, M.M.R., Souza, J.G.M.V., Saltori, E.K., FranÃ§a, B.H.S.                                                                                                                                                               | Parental acceptance of the use of diamine silver fluoride in children aged 0 to 3 years in the city of Cascavel, PR, Brazil                                               | Pesquisa Brasileira em Odontopediatria e Clinica Integrada | Different outcome       |
| 2019 | Trieu A., Mohamed A., Lynch E.                                                                                                                                                                                                                 | Silver diamine fluoride versus sodium fluoride for arresting dentine caries in children: a systematic review and meta-analysis                                            | Scientific reports                                         | Different type of study |
| 2021 | Tripathi, P., Mengi, R., Gajare, S.M., Nanda, S.S., Wani, S.A., Kochhar, A.S.                                                                                                                                                                  | Evaluation of Remineralizing Capacity of P11-4, CPP-ACP, Silver Diamine Fluoride, and NovaMin: An In Vitro Study                                                          | Journal of Contemporary Dental Practice                    | Different type of study |
| 2011 | Tschoppe, P., Meyer-Lueckel, H.                                                                                                                                                                                                                | Mineral distribution of artificial dentinal caries lesions after treatment with fluoride agents in combination with saliva substitutes                                    | Archives of Oral Biology                                   | Different type of study |
| 2020 | Turton B., Patel J., Hill R., Sieng C., Durward C.                                                                                                                                                                                             | Healthy Kids Cambodia - A novel approach to triage for dental care in a population with extreme caries experience                                                         | Community dentistry and oral epidemiology                  | Serch noise             |
| 2015 | Twetman S, Dhar V.                                                                                                                                                                                                                             | Evidence of Effectiveness of Current Therapies to Prevent and Treat Early Childhood Caries                                                                                | Pediatr Dent                                               | Different type of study |
| 2015 | Twetman S.                                                                                                                                                                                                                                     | The evidence base for professional and self-care prevention--caries, erosion and sensitivity                                                                              | BMC Oral Health                                            | Different type of study |
| 2020 | Uchil SR, Suprabha BS, Suman E, Shenoy R, Natarajan S, Rao A.                                                                                                                                                                                  | Effect of three silver diamine fluoride application protocols on the microtensile bond strength of resin-modified glass ionomer cement to carious dentin in primary teeth | J Indian Soc Pedod Prev Dent                               | Different outcome       |
| 2019 | Urquhart O, Tampi MP, Pilcher L, Slayton RL, Araujo MWB, Fontana M, GuzmÃn-Armstrong S, Nascimento MM, NovÃ½ BB, Tinanoff N, Weyant RJ, Wolff MS, Young DA, Zero DT, Brignardello-Petersen R, Banfield L, Parikh A, Joshi G, Carrasco-Labra A. | Nonrestorative Treatments for Caries: Systematic Review and Network Meta-analysis                                                                                         | J Dent Res                                                 | Different type of study |
| 2015 | van der Kaaij, N.C.W., van der Veen, M.H., van der Kaaij, M.A.E., ten Cate, J.M.                                                                                                                                                               | A prospective, randomized placebo-controlled clinical trial on the effects of a fluoride rinse on white spot lesion development and bleeding in orthodontic patients      | European Journal of Oral Sciences                          | Different outcome       |

|      |                                                                                                                        |                                                                                                                                                                     |                                                            |                         |
|------|------------------------------------------------------------------------------------------------------------------------|---------------------------------------------------------------------------------------------------------------------------------------------------------------------|------------------------------------------------------------|-------------------------|
| 2018 | van Strijp G, van Loveren C.                                                                                           | No Removal and Inactivation of Carious Tissue: Non-Restorative Cavity Control                                                                                       | Monogr Oral Sci                                            | Different type of study |
| 2020 | Vargas JP, Uribe M, Ortuño D, Verdugo-Paiva F.                                                                         | Silver diamine fluoride compared to atraumatic restorative technique for the treatment of caries in primary and mixed first phase dentition                         | Medwave                                                    | Different type of study |
| 2012 | Vasquez, E., Zegarra, G., Chirinos, E., Castillo, J.L., Taves, D.R., Watson, G.E., Dills, R., Mancl, L.L., Milgrom, P. | Short term serum pharmacokinetics of diammine silver fluoride after oral application                                                                                | BMC Oral Health                                            | Different outcome       |
| 2021 | Vennela E, Sharada J, Hasanuddin S, Suhasini K, Hemachandrika I, Singh PT.                                             | Comparison of staining potential of silver diamine fluoride versus silver diamine fluoride and potassium iodide under tooth-colored restorations: An in vitro study | J Indian Soc Pedod Prev Dent                               | Different type of study |
| 2013 | Vichi, A., Margvelashvili, M., Goracci, C., Papacchini, F., Ferrari, M.                                                | Bonding and sealing ability of a new self-adhering flowable composite resin in class I restorations                                                                 | Clinical Oral Investigations                               | Serch noise             |
| 2020 | Vinod D, Gopalakrishnan A, Subramani SM, Balachandran M, Manoharan V, Joy A.                                           | A Comparative Evaluation of Remineralizing Potential of Three Commercially Available Remineralizing Agents: An In Vitro Study                                       | Int J Clin Pediatr Dent                                    | Different type of study |
| 2018 | Vinson LA, Gilbert PR, Sanders BJ, Moser E, Gregory RL.                                                                | Silver Diamine Fluoride and Potassium Iodide Disruption of In Vitro Streptococcus mutans Biofilm                                                                    | J Dent Child (Chic)                                        | Different type of study |
| 2019 | Vollu, A.L., Moreira, J.P.L., Luiz, R.R., Barja-Fidalgo, F., Fonseca-Gonçalves, A.                                     | Survey of knowledge, attitudes and practices of brazilian dentists regarding silver diamine fluoride                                                                | Pesquisa Brasileira em Odontopediatria e Clínica Integrada | Different outcome       |
| 2021 | Wakhloo T, Reddy SG, Sharma SK, Chug A, Dixit A, Thakur K.                                                             | Silver Diamine Fluoride Versus Atraumatic Restorative Treatment in Pediatric Dental Caries Management: A Systematic Review and Meta-analysis                        | J Int Soc Prev Community Dent                              | Different type of study |
| 2017 | Walsh, L.J.                                                                                                            | Minimal intervention management of the older patient                                                                                                                | British Dental Journal                                     | Serch noise             |
| 1998 | Wandern, A.                                                                                                            | In vitro enamel effects of a resin-modified glass ionomer: Fluoride uptake and resistance to demineralization                                                       | Pediatric Dentistry                                        | Serch noise             |

|      |                                                                          |                                                                                                                                                                        |                                                              |                         |
|------|--------------------------------------------------------------------------|------------------------------------------------------------------------------------------------------------------------------------------------------------------------|--------------------------------------------------------------|-------------------------|
| 1991 | Wang, N.-H., von der Lehr, W.N.                                          | The direct and indirect techniques of making magnetically retained overdentures                                                                                        | The Journal of Prosthetic Dentistry                          | Serch noise             |
| 2015 | Wang, X., Wang, B., Wang, Y.                                             | Antibacterial orthodontic cement to combat biofilm and white spot lesions                                                                                              | American Journal of Orthodontics and Dentofacial Orthopedics | Serch noise             |
| 2020 | Warren J.J., Thrap S., Starr D.                                          | Dental caries treatment completed under general anesthesia among American Indian children in a northern plains tribal community                                        | Journal of public health dentistry                           | Serch noise             |
| 2014 | Wegehaupt, F.J., Buchalla, W., Sener, B., Attin, T., Schmidlin, P.R.     | Cerium chloride reduces enamel lesion initiation and progression in vitro                                                                                              | Caries Research                                              | Serch noise             |
| 2019 | Weintraub J.A., Birken S.A., Burgette J.M., Lewis T.A., White B.A.       | Use of the consolidated framework for implementation research to assess determinants of silver diamine fluoride implementation in safety net dental clinics            | Journal of public health dentistry                           | Different type of study |
| 2015 | Wierichs RJ, Meyer-Lueckel H.                                            | Systematic review on noninvasive treatment of root caries lesions                                                                                                      | J Dent Res                                                   | Different type of study |
| 2018 | Wierichs RJ, Stausberg S, Lausch J, Meyer-Lueckel H, Esteves-Oliveira M. | Caries-Preventive Effect of NaF, NaF plus TCP, NaF plus CPP-ACP, and SDF Varnishes on Sound Dentin and Artificial Dentin Caries in vitro                               | Caries Res                                                   | Different type of study |
| 2017 | Wong A, Subar PE, Young DA.                                              | Dental Caries: An Update on Dental Trends and Therapy                                                                                                                  | Adv Pediatr                                                  | Different type of study |
| 2011 | Wong MC, Lam KF, Lo EC.                                                  | Analysis of multilevel grouped survival data with time-varying regression coefficients                                                                                 | Stat Med                                                     | Serch noise             |
| 2005 | Wong MC, Lam KF, Lo EC.                                                  | Bayesian analysis of clustered interval-censored data                                                                                                                  | J Dent Res                                                   | Serch noise             |
| 1993 | Wood, R.E., Maxymiw, W.G., McComb, D.                                    | A clinical comparison of glass ionomer (polyalkenoate) and silver amalgam restorations in the treatment of Class 5 caries in xerostomic head and neck cancer patients. | Operative dentistry                                          | Serch noise             |

|      |                                                                                       |                                                                                                                                                                                       |                                  |                                  |
|------|---------------------------------------------------------------------------------------|---------------------------------------------------------------------------------------------------------------------------------------------------------------------------------------|----------------------------------|----------------------------------|
| 2017 | Wright J.T., White A.                                                                 | Silver Diamine Fluoride: Changing the Caries Management Paradigm and Potential Societal Impact                                                                                        | North Carolina medical journal   | Different type of study          |
| 2016 | Wu DJ, Velamakanni S, Denisson J, Yaman P, Boynton JR, Papagerakis P.                 | Effect of Silver Diamine Fluoride (SDF) Application on Microtensile Bonding Strength of Dentin in Primary Teeth                                                                       | Pediatr Dent                     | Different outcome                |
| 2020 | Yalmaz, N., Ocak, M., Ąkte, Z.                                                        | REMINERALIZATION OF PRIMARY MOLAR DENTINE WITH SILVER DIAMINE FLUORIDE AND SODIUM FLUORIDE: AN IN VITRO STUDY                                                                         | Cumhuriyet Dental Journal        | Different type of study          |
| 2019 | Yamada Y, Nakamura-Yamada S, Umemura-Kubota E, Baba S.                                | Diagnostic Cytokines and Comparative Analysis Secreted from Exfoliated Deciduous Teeth, Dental Pulp, and Bone Marrow Derived Mesenchymal Stem Cells for Functional Cell-Based Therapy | Int J Mol Sci                    | Serch noise                      |
| 1972 | Yamaga R, Nishino M, Yoshida S, Yokomizo I.                                           | Diammine silver fluoride and its clinical application                                                                                                                                 | J Osaka Univ Dent Sch            | Abstract or full-text not avable |
| 2019 | Yarmarkovich P , Alranyes S , Lee HH , LeHew C , da Fonseca MA                        | SDF's Role in Reducing Urgent-Care Encounters While Awaiting General Anesthesia                                                                                                       | Pediatr Dent                     | Different type of study          |
| 2021 | Yawary R, Hegde S.                                                                    | Silver Diamine Fluoride Protocol for Reducing Preventable Dental Hospitalisations in Victorian Children                                                                               | Int Dent J                       | Different type of study          |
| 2014 | Yetkiner, E., Wegehaupt, F., Wiegand, A., Attin, R., Attin, T.                        | Colour improvement and stability of white spot lesions following infiltration, micro-abrasion, or fluoride treatments in vitro                                                        | European Journal of Orthodontics | Different type of study          |
| 2020 | Yin IX, Zhao IS, Mei ML, Li Q, Yu OY, Chu CH.                                         | Use of Silver Nanomaterials for Caries Prevention: A Concise Review                                                                                                                   | Int J Nanomedicine               | Different type of study          |
| 2020 | Yin, I.X., Yu, O.Y., Zhao, I.S., Mei, M.L., Li, Q.L., Tang, J., Lo, E.C.M., Chu, C.H. | Inhibition of dentine caries using fluoride solution with silver nanoparticles: An in vitro study                                                                                     | Journal of Dentistry             | Different type of study          |
| 2018 | Young DA, Frostad-Thomas A, Gold J, Wong A.                                           | Secondary Sjogren syndrome: A case report using silver diamine fluoride and glass ionomer cement                                                                                      | J Am Dent Assoc                  | Different outcome                |

|      |                                                                                                                  |                                                                                                                                                                                                   |                                       |                          |
|------|------------------------------------------------------------------------------------------------------------------|---------------------------------------------------------------------------------------------------------------------------------------------------------------------------------------------------|---------------------------------------|--------------------------|
| 2021 | Young DA, Quock RL, Horst J, Kaur R, MacLean JK, Frachella JC, Duffin S, Semprum-Clavier A, Ferreira Zandona AG. | Clinical Instructions for Using Silver Diamine Fluoride (SDF) in Dental Caries Management                                                                                                         | Compend Contin Educ Dent              | Different outcome        |
| 2018 | Yu OY, Mei ML, Zhao IS, Li QL, Lo EC, Chu CH.                                                                    | Remineralisation of enamel with silver diamine fluoride and sodium fluoride                                                                                                                       | Dent Mater                            | Different type of study  |
| 2018 | Yu OY, Zhao IS, Mei ML, Lo ECM, Chu CH.                                                                          | Caries-arresting effects of silver diamine fluoride and sodium fluoride on dentine caries lesions                                                                                                 | J Dent                                | Different type of study  |
| 2019 | Zander V, Chan D, Sadr A.                                                                                        | Microcomputed Tomography Evaluation of Root Dentin Caries Prevention by Topical Fluorides and Potassium Iodide                                                                                    | Sensors (Basel)                       | Serch noise              |
| 1945 | Zander, H.A., Smith, H.W.                                                                                        | Penetration of silver nitrate into dentin II                                                                                                                                                      | Journal of Dental Research            | Serch noise              |
| 2013 | Zavareh, F.A., Samimi, P., Birang, R., Eskini, M., Bouraima, S.A.                                                | Assessment of microleakage of class V composite resin restoration following erbium-doped yttrium aluminum garnet (Er: YAG) laser conditioning and acid etching with two different bonding systems | Journal of Lasers in Medical Sciences | Serch noise              |
| 2009 | Zehetbauer, S., Wojahn, T., Hiller, K.-A., Schmalz, G., Ruhl, S.                                                 | Resemblance of salivary protein profiles between children with early childhood caries and caries-free controls                                                                                    | European Journal of Oral Sciences     | Serch noise              |
| 1996 | Zhang C, Kimura Y, Matsumoto K.                                                                                  | The effects of pulsed Nd:YAG laser irradiation with fluoride on root surface                                                                                                                      | J Clin Laser Med Surg                 | Serch noise              |
| 2020 | Zhang J, Sardana D, Li KY, Leung KCM, Lo ECM.                                                                    | Topical Fluoride to Prevent Root Caries: Systematic Review with Network Meta-analysis                                                                                                             | J Dent Res                            | Sdifferent type of study |
| 2013 | Zhang W, McGrath C, Lo EC, Li JY.                                                                                | Silver diamine fluoride and education to prevent and arrest root caries among community-dwelling elders                                                                                           | Caries Res                            | Different outcome        |
| 2018 | Zhao IS, Gao SS, Hiraishi N, Burrow MF, Duangthip D, Mei ML, Lo EC, Chu CH.                                      | Mechanisms of silver diamine fluoride on arresting caries: a literature review                                                                                                                    | Int Dent J                            | Different type of study  |

|      |                                                                                      |                                                                                                                                                                       |                                  |                         |
|------|--------------------------------------------------------------------------------------|-----------------------------------------------------------------------------------------------------------------------------------------------------------------------|----------------------------------|-------------------------|
| 2017 | Zhao IS, Mei ML, Burrow MF, Lo EC, Chu CH.                                           | Effect of Silver Diamine Fluoride and Potassium Iodide Treatment on Secondary Caries Prevention and Tooth Discolouration in Cervical Glass Ionomer Cement Restoration | Int J Mol Sci                    | Different outcome       |
| 2017 | Zhao IS, Mei ML, Burrow MF, Lo EC, Chu CH.                                           | Prevention of secondary caries using silver diamine fluoride treatment and casein phosphopeptide-amorphous calcium phosphate modified glass-ionomer cement            | J Dent                           | Different type of study |
| 2017 | Zhao IS, Mei ML, Li QL, Lo ECM, Chu CH.                                              | Arresting simulated dentine caries with adjunctive application of silver nitrate solution and sodium fluoride varnish: an in vitro study                              | Int Dent J                       | Serch noise             |
| 2021 | Zhao IS, Xue VW, Yin IX, Niu JY, Lo ECM, Chu CH.                                     | Use of a novel 9.3-um carbon dioxide laser and silver diamine fluoride: Prevention of enamel demineralisation and inhibition of cariogenic bacteria                   | Dent Mater                       | Serch noise             |
| 2020 | Zhao IS, Yin IX, Mei ML, Lo ECM, Tang J, Li Q, So LY, Chu CH.                        | Remineralising Dentine Caries Using Sodium Fluoride with Silver Nanoparticles: An In Vitro Study                                                                      | Int J Nanomedicine               | Different type of study |
| 2019 | Zhao, I.S., Chu, S., Yu, O.Y., Mei, M.L., Chu, C.H., Lo, E.C.M.                      | Effect of silver diamine fluoride and potassium iodide on shear bond strength of glass ionomer cements to caries-affected dentine                                     | International Dental Journal     | Different outcome       |
| 2013 | Zhi, Q.H., Lo, E.C.M., Kwok, A.C.Y.                                                  | An in vitro study of silver and fluoride ions on remineralization of demineralized enamel and dentine                                                                 | Australian Dental Journal        | Different type of study |
| 2014 | Zingler, S., Pritsch, M., Wrede, D.J., Ludwig, B., Bister, D., Kneist, S., Lux, C.J. | A randomized clinical trial comparing the impact of different oral hygiene protocols and sealant applications on plaque, gingival, and caries index scores            | European Journal of Orthodontics | Serch noise             |
| 2018 |                                                                                      | Policy on the Use of Silver Diamine Fluoride for Pediatric Dental Patients                                                                                            | Pediatric dentistry              | Different type of study |
| 2018 |                                                                                      | Use of Silver Diamine Fluoride for Dental Caries Management in Children and Adolescents, Including Those with Special Health Care Needs                               | Pediatric dentistry              | Different type of study |



**Table S3.** Studies studies excluded after full-text reading.

| Publication Year | Author Names                                                            | Title                                                                                                                                                                | Source title                                                          | Reason for exclusion         |
|------------------|-------------------------------------------------------------------------|----------------------------------------------------------------------------------------------------------------------------------------------------------------------|-----------------------------------------------------------------------|------------------------------|
| 2020             | Al-Nerabieah, Z., Arrag, E.A., Comisi, J.C., Rajab, A.                  | Effectiveness of a novel nano-silver fluoride with green tea extract compared with silver diamine fluoride: A randomized, controlled, non-inferiority trial          | International Journal of Dentistry and Oral Science                   | Not data for posterior teeth |
| 2017             | Anggraini, R., Darwita, R.R., Adiatman, M.                              | The effectiveness of silver diamine fluoride and propolis fluoride in arresting caries on primary teeth: A study on kindergarten students in west jakarta, indonesia | Journal of International Dental and Medical Research                  | Not data for posterior teeth |
| 2019             | Bernstein R.S., Johnston B., Mackay K., Sanders J.                      | Implementation of a primary care physician-led Cavity Clinic using silver diamine fluoride                                                                           | Journal of public health dentistry                                    | Not data for posterior teeth |
| 2021             | Chaurasiya A., Gojanur S.                                               | Evaluation of the clinical efficacy of 38% silver diamine fluoride in arresting dental caries in primary teeth and its parental acceptance                           | Journal of the Indian Society of Pedodontics and Preventive Dentistry | Not data for posterior teeth |
| 2018             | Clemens J., Gold J., Chaffin J.                                         | Effect and acceptance of silver diamine fluoride treatment on dental caries in primary teeth                                                                         | Journal of public health dentistry                                    | Not data for posterior teeth |
| 2012             | Dos Santos Jr. V.E., De Vasconcelos F.M.N., Ribeiro A.G., Rosenblatt A. | Paradigm shift in the effective treatment of caries in schoolchildren at risk                                                                                        | International Dental Journal                                          | Not data for posterior teeth |
| 2016             | Duangthip D., Chu C.H., Lo E.C.                                         | A randomized clinical trial on arresting dentine caries in preschool children by topical fluorides--18 month results                                                 | Journal of Dentistry                                                  | Not data for posterior teeth |
| 2018             | Duangthip D., Wong M.C.M., Chu C.H., Lo E.C.M.                          | Caries arrest by topical fluorides in preschool children: 30-month results                                                                                           | Journal of Dentistry                                                  | Not data for posterior teeth |
| 2019             | Fahmi M.Q.M., Abbas M.J., Almallah L.A.A.                               | Topical effect of silver diamine fluoride in arresting dental caries in primary teeth                                                                                | Indian Journal of Public Health Research and Development              | Not data for posterior teeth |

|      |                                                                                                             |                                                                                                                                                                                                         |                                                          |                                                                 |
|------|-------------------------------------------------------------------------------------------------------------|---------------------------------------------------------------------------------------------------------------------------------------------------------------------------------------------------------|----------------------------------------------------------|-----------------------------------------------------------------|
| 2016 | Fung MHT, Duangthip D, Wong MCM, Lo ECM, Chu CH.                                                            | Arresting Dentine Caries with Different Concentration and Periodicity of Silver Diamine Fluoride                                                                                                        | JDR Clin Trans Res                                       | Same sample included in another article with a longer follow-up |
| 2020 | Gao S.S., Chen K.J., Duangthip D., Wong M.C.M., Lo E.C.M., Chu C.H.                                         | Preventing early childhood caries with silver diamine fluoride: Study protocol for a randomised clinical trial                                                                                          | Trials                                                   | Not data for posterior teeth                                    |
| 2019 | Gao S.S., Duangthip D., Wong M.C.M., Lo E.C.M., Chu C.H.                                                    | Randomized Trial of Silver Nitrate with Sodium Fluoride for Caries Arrest                                                                                                                               | Journal of Dental Research                               | Same sample included in another article with a longer follow-up |
| 1994 | McDonald SP, Sheiham A.                                                                                     | A clinical comparison of non-traumatic methods of treating dental caries                                                                                                                                | Int Dent J                                               | Full text unavailable                                           |
| 2018 | Milgrom P., Horst J.A., Ludwig S., Rothen M., Chaffee B.W., Lyalina S., Pollard K.S., DeRisi J.L., Mancl L. | Topical silver diamine fluoride for dental caries arrest in preschool children: A randomized controlled trial and microbiological analysis of caries associated microbes and resistance gene expression | Journal of dentistry                                     | Not data for posterior teeth                                    |
| 2021 | Rehim Y.M.A., Waly N.G., Abdelgawad F., Elmasry E.S.                                                        | Pain, new caries and failure of carious primary teeth after application of silver diamine fluoride versus sodium fluoride varnish: A randomized clinical trial                                          | Indian Journal of Public Health Research and Development | Not data for posterior teeth                                    |
| 2020 | Turton B, Horn R, Durward C.                                                                                | Caries arrest and lesion appearance using two different silver fluoride therapies with and without potassium iodide: 6-month results                                                                    | Heliyon                                                  | Same sample included in another article with a longer follow-up |
| 2021 | Turton B., Horn R., Durward C.                                                                              | Caries arrest and lesion appearance using two different silver fluoride therapies on primary teeth with and without potassium iodide: 12-month results                                                  | Clinical and experimental dental research                | Not data for posterior teeth                                    |
| 2009 | Yee R., Holmgren C., Mulder J., Lama D., Walker D., Helderma W.V.P.                                         | Efficacy of silver diamine fluoride for arresting caries treatment                                                                                                                                      | Journal of Dental Research                               | Not data for posterior teeth                                    |
| 2021 | Raskin S.E., Tranby E.P., Ludwig S., Okunev I., Frantsve-Hawley J., Boynes S.                               | Survival of silver diamine fluoride among patients treated in community dental clinics: a naturalistic study                                                                                            | BMC oral health                                          | Follow-up < 12 m.                                               |

**Table S4.** Summary statistics, results for each study (fixed-effect model)

| Authors (Year)           | N    | n1  | n2  | ES (LL-UL)         | Sig  | R-Sig |
|--------------------------|------|-----|-----|--------------------|------|-------|
| Abdellatif et al. (2021) | 123  | 49  | 74  | 0.85 (-0.37-2.07)  | 0.17 | 0.43  |
| Mabangkhu et al. (2020)  | 646  | 279 | 367 | 0.38 (0.17-0.59)   | 0.00 | 0.91  |
| Tirupathi et al. (2019)  | 147  | 76  | 71  | -0.13 (-0.56-0.29) | 0.53 | 0.02  |
| Vollú et al. (2019)      | 111  | 63  | 48  | 0.10 (-0.80-1.01)  | 0.82 | 0.60  |
| Fung et al. (2018)       | 1505 | 738 | 767 | 0.37 (0.27-0.47)   | 0.00 | 0.72  |

**N** = Total sample size; **n1** = Group A sample size; **n2** = Group B sample size; **ES (LL-UL)** = Effect Size (95%CI Lower Limit- 95%CI Upper Limit); **Sig** = Statistical significance 2-tailed; **R-Sig**= Statistical significance for standardized residual
